# Supplementary material for: RNA-Binding Proteins CLK1 and POP7 as Biomarkers for Diagnosis and Prognosis of Esophageal Squamous Cell Carcinoma
Source: Front Cell Dev Biol. 2021 Sep 9;9:715027. doi: 10.3389/fcell.2021.715027 (PMC8458940; doi:10.3389/fcell.2021.715027)
Supplement: Supplementary Table 1 — GO and KEGG analysis of the differentially expressed RBPs. [file Table_1.XLSX]

## Sheet: GO-up
ONTOLOGY	ID	Description	GeneRatio	BgRatio	pvalue	p.adjust	qvalue	geneID	Count
BP	GO:0006913	nucleocytoplasmic transport	29/112	357/18493	8.19813e-25	7.85873e-22	6.551e-22	NCBP2/ZC3H12A/LSG1/XPO5/SNRPD2/IPO4/EIF6/EIF5A/RSRC1/ALYREF/EIF4A3/SNRPD1/BARD1/SNRPG/DDX39A/XPOT/NXT1/RAN/SNRPF/THOC3/NUTF2/RAE1/SNRPB/SMN1/XPO1/GEMIN2/THOC6/MAGOH/MAGOHB	29
BP	GO:0051169	nuclear transport	29/112	360/18493	1.04158e-24	7.85873e-22	6.551e-22	NCBP2/ZC3H12A/LSG1/XPO5/SNRPD2/IPO4/EIF6/EIF5A/RSRC1/ALYREF/EIF4A3/SNRPD1/BARD1/SNRPG/DDX39A/XPOT/NXT1/RAN/SNRPF/THOC3/NUTF2/RAE1/SNRPB/SMN1/XPO1/GEMIN2/THOC6/MAGOH/MAGOHB	29
BP	GO:0006403	RNA localization	23/112	231/18493	9.57651e-22	4.81698e-19	4.01541e-19	NCBP2/XPO5/EIF6/EIF5A/ALYREF/EIF4A3/IGF2BP1/IGF2BP3/RUVBL1/PNPT1/DDX39A/XPOT/DKC1/NXT1/RAN/THOC3/NUTF2/RAE1/XPO1/THOC6/MAGOH/MAGOHB/WRAP53	23
BP	GO:0022613	ribonucleoprotein complex biogenesis	29/112	485/18493	4.60152e-21	1.73592e-18	1.44706e-18	BYSL/SNRPD2/BOP1/EIF6/BRIX1/NOP2/RRP9/EIF4A3/NSUN5/SNRPD1/SNRPC/RUVBL1/SNRPG/DKC1/EXOSC5/PTGES3/RAN/HEATR1/SNRPF/ISY1/ERI1/NOP56/UTP18/NPM3/SNRPB/SMN1/XPO1/GEMIN2/DCAF13	29
BP	GO:0050657	nucleic acid transport	20/112	195/18493	3.0126e-19	7.57669e-17	6.31589e-17	NCBP2/XPO5/EIF6/EIF5A/ALYREF/EIF4A3/IGF2BP1/IGF2BP3/PNPT1/DDX39A/XPOT/NXT1/RAN/THOC3/NUTF2/RAE1/XPO1/THOC6/MAGOH/MAGOHB	20
BP	GO:0050658	RNA transport	20/112	195/18493	3.0126e-19	7.57669e-17	6.31589e-17	NCBP2/XPO5/EIF6/EIF5A/ALYREF/EIF4A3/IGF2BP1/IGF2BP3/PNPT1/DDX39A/XPOT/NXT1/RAN/THOC3/NUTF2/RAE1/XPO1/THOC6/MAGOH/MAGOHB	20
BP	GO:0051236	establishment of RNA localization	20/112	198/18493	4.09434e-19	8.82623e-17	7.3575e-17	NCBP2/XPO5/EIF6/EIF5A/ALYREF/EIF4A3/IGF2BP1/IGF2BP3/PNPT1/DDX39A/XPOT/NXT1/RAN/THOC3/NUTF2/RAE1/XPO1/THOC6/MAGOH/MAGOHB	20
BP	GO:0034470	ncRNA processing	24/112	376/18493	4.02937e-18	7.6004e-16	6.33566e-16	BYSL/METTL1/BOP1/NOP2/RRP9/PUS1/TRMT6/PUS7/DUS4L/EIF4A3/NSUN5/POP7/DKC1/EXOSC5/HEATR1/NSUN2/ERI1/NOP56/UTP18/NPM3/DCAF13/POP1/RPP40/PTCD1	24
BP	GO:0051168	nuclear export	19/112	194/18493	6.09602e-18	1.0221e-15	8.52017e-16	NCBP2/LSG1/XPO5/EIF6/EIF5A/ALYREF/EIF4A3/BARD1/DDX39A/XPOT/NXT1/RAN/THOC3/NUTF2/RAE1/XPO1/THOC6/MAGOH/MAGOHB	19
BP	GO:0015931	nucleobase-containing compound transport	20/112	237/18493	1.4645e-17	2.20993e-15	1.84218e-15	NCBP2/XPO5/EIF6/EIF5A/ALYREF/EIF4A3/IGF2BP1/IGF2BP3/PNPT1/DDX39A/XPOT/NXT1/RAN/THOC3/NUTF2/RAE1/XPO1/THOC6/MAGOH/MAGOHB	20
BP	GO:0006611	protein export from nucleus	18/112	180/18493	3.32964e-17	4.56766e-15	3.80758e-15	NCBP2/XPO5/EIF6/EIF5A/ALYREF/EIF4A3/BARD1/DDX39A/XPOT/NXT1/RAN/THOC3/NUTF2/RAE1/XPO1/THOC6/MAGOH/MAGOHB	18
BP	GO:0006405	RNA export from nucleus	16/112	137/18493	1.74967e-16	2.20021e-14	1.83409e-14	NCBP2/XPO5/EIF6/EIF5A/ALYREF/EIF4A3/DDX39A/XPOT/NXT1/RAN/THOC3/RAE1/XPO1/THOC6/MAGOH/MAGOHB	16
BP	GO:0071426	ribonucleoprotein complex export from nucleus	15/112	129/18493	1.73697e-15	2.01622e-13	1.68071e-13	NCBP2/EIF6/EIF5A/ALYREF/EIF4A3/DDX39A/XPOT/NXT1/RAN/THOC3/RAE1/XPO1/THOC6/MAGOH/MAGOHB	15
BP	GO:0071166	ribonucleoprotein complex localization	15/112	130/18493	1.95383e-15	2.10595e-13	1.75551e-13	NCBP2/EIF6/EIF5A/ALYREF/EIF4A3/DDX39A/XPOT/NXT1/RAN/THOC3/RAE1/XPO1/THOC6/MAGOH/MAGOHB	15
BP	GO:0008380	RNA splicing	23/112	463/18493	5.05996e-15	5.09032e-13	4.24327e-13	NCBP2/SNRPD2/RSRC1/ALYREF/EIF4A3/SNRPD1/SNRPC/SNRPG/DDX39A/SNRPF/ISY1/THOC3/PPIH/SNRPB/SMN1/TTF2/EFTUD2/GEMIN2/THOC6/PRPF4/MAGOH/MAGOHB/SF3B4	23
BP	GO:0031123	RNA 3'-end processing	15/112	146/18493	1.13239e-14	1.06798e-12	8.90265e-13	NCBP2/ALYREF/EIF4A3/BARD1/PNPT1/DDX39A/DKC1/EXOSC5/THOC3/ERI1/PABPC1L/THOC6/MAGOH/MAGOHB/PTCD1	15
BP	GO:0051028	mRNA transport	15/112	151/18493	1.87788e-14	1.6669e-12	1.38952e-12	NCBP2/EIF5A/ALYREF/EIF4A3/IGF2BP1/IGF2BP3/DDX39A/NXT1/THOC3/NUTF2/RAE1/XPO1/THOC6/MAGOH/MAGOHB	15
BP	GO:0042254	ribosome biogenesis	18/112	282/18493	9.06362e-14	7.13229e-12	5.94544e-12	BYSL/BOP1/EIF6/BRIX1/NOP2/RRP9/EIF4A3/NSUN5/DKC1/EXOSC5/RAN/HEATR1/ERI1/NOP56/UTP18/NPM3/XPO1/DCAF13	18
BP	GO:0000377	RNA splicing, via transesterification reactions with bulged adenosine as nucleophile	20/112	374/18493	9.453e-14	7.13229e-12	5.94544e-12	NCBP2/SNRPD2/RSRC1/ALYREF/EIF4A3/SNRPD1/SNRPC/SNRPG/DDX39A/SNRPF/ISY1/PPIH/SNRPB/SMN1/EFTUD2/GEMIN2/PRPF4/MAGOH/MAGOHB/SF3B4	20
BP	GO:0000398	mRNA splicing, via spliceosome	20/112	374/18493	9.453e-14	7.13229e-12	5.94544e-12	NCBP2/SNRPD2/RSRC1/ALYREF/EIF4A3/SNRPD1/SNRPC/SNRPG/DDX39A/SNRPF/ISY1/PPIH/SNRPB/SMN1/EFTUD2/GEMIN2/PRPF4/MAGOH/MAGOHB/SF3B4	20
BP	GO:0000375	RNA splicing, via transesterification reactions	20/112	377/18493	1.09774e-13	7.88806e-12	6.57544e-12	NCBP2/SNRPD2/RSRC1/ALYREF/EIF4A3/SNRPD1/SNRPC/SNRPG/DDX39A/SNRPF/ISY1/PPIH/SNRPB/SMN1/EFTUD2/GEMIN2/PRPF4/MAGOH/MAGOHB/SF3B4	20
BP	GO:0090501	RNA phosphodiester bond hydrolysis	14/112	152/18493	4.21216e-13	2.88916e-11	2.40839e-11	NCBP2/ZC3H12A/BOP1/RNASE10/PNPT1/POP7/RNASE2/RNASE3/EXOSC5/ERI1/POP1/RNASEH2A/RPP40/EXO1	14
BP	GO:0006401	RNA catabolic process	18/112	340/18493	2.17865e-12	1.42938e-10	1.19152e-10	NCBP2/ZC3H12A/OAS2/EIF4A3/IGF2BP1/IGF2BP3/PNPT1/RNASE2/RNASE3/DKC1/DHX34/EXOSC5/HELZ2/XPO1/POP1/RNASEH2A/MAGOH/MAGOHB	18
BP	GO:0031124	mRNA 3'-end processing	11/112	95/18493	1.24335e-11	7.81755e-10	6.51667e-10	NCBP2/ALYREF/EIF4A3/BARD1/PNPT1/DDX39A/THOC3/PABPC1L/THOC6/MAGOH/MAGOHB	11
BP	GO:0016072	rRNA metabolic process	15/112	240/18493	1.65441e-11	9.98599e-10	8.32427e-10	CD3EAP/BYSL/BOP1/NOP2/RRP9/EIF4A3/NSUN5/DKC1/EXOSC5/HEATR1/ERI1/NOP56/UTP18/NPM3/DCAF13	15
BP	GO:0071826	ribonucleoprotein complex subunit organization	16/112	289/18493	2.07044e-11	1.20165e-09	1.00169e-09	SNRPD2/BOP1/EIF6/TDRD5/BRIX1/NOP2/SNRPD1/SNRPC/RUVBL1/SNRPG/PTGES3/SNRPF/ISY1/SNRPB/SMN1/GEMIN2	16
BP	GO:0006364	rRNA processing	14/112	205/18493	2.50855e-11	1.402e-09	1.1687e-09	BYSL/BOP1/NOP2/RRP9/EIF4A3/NSUN5/DKC1/EXOSC5/HEATR1/ERI1/NOP56/UTP18/NPM3/DCAF13	14
BP	GO:0006406	mRNA export from nucleus	11/112	110/18493	6.29559e-11	3.27588e-09	2.73075e-09	NCBP2/EIF5A/ALYREF/EIF4A3/DDX39A/NXT1/THOC3/RAE1/THOC6/MAGOH/MAGOHB	11
BP	GO:0071427	mRNA-containing ribonucleoprotein complex export from nucleus	11/112	110/18493	6.29559e-11	3.27588e-09	2.73075e-09	NCBP2/EIF5A/ALYREF/EIF4A3/DDX39A/NXT1/THOC3/RAE1/THOC6/MAGOH/MAGOHB	11
BP	GO:0022618	ribonucleoprotein complex assembly	15/112	275/18493	1.13516e-10	5.70988e-09	4.75973e-09	SNRPD2/BOP1/EIF6/BRIX1/NOP2/SNRPD1/SNRPC/RUVBL1/SNRPG/PTGES3/SNRPF/ISY1/SNRPB/SMN1/GEMIN2	15
BP	GO:0031503	protein-containing complex localization	15/112	280/18493	1.4612e-10	7.11275e-09	5.92915e-09	NCBP2/EIF6/EIF5A/ALYREF/EIF4A3/DDX39A/XPOT/NXT1/RAN/THOC3/RAE1/XPO1/THOC6/MAGOH/MAGOHB	15
BP	GO:0009451	RNA modification	12/112	157/18493	1.95173e-10	9.20362e-09	7.67209e-09	METTL1/HENMT1/APOBEC3F/APOBEC3G/NOP2/PUS1/TRMT6/PUS7/DUS4L/NSUN5/DKC1/NSUN2	12
BP	GO:0051170	import into nucleus	12/112	178/18493	8.34541e-10	3.76034e-08	3.1346e-08	ZC3H12A/SNRPD2/IPO4/SNRPD1/SNRPG/NXT1/RAN/SNRPF/NUTF2/SNRPB/SMN1/GEMIN2	12
BP	GO:0000387	spliceosomal snRNP assembly	8/112	52/18493	8.4726e-10	3.76034e-08	3.1346e-08	SNRPD2/SNRPD1/SNRPC/SNRPG/SNRPF/SNRPB/SMN1/GEMIN2	8
BP	GO:0090305	nucleic acid phosphodiester bond hydrolysis	14/112	295/18493	3.00817e-09	1.29695e-07	1.08113e-07	NCBP2/ZC3H12A/BOP1/RNASE10/PNPT1/POP7/RNASE2/RNASE3/EXOSC5/ERI1/POP1/RNASEH2A/RPP40/EXO1	14
BP	GO:0008033	tRNA processing	10/112	123/18493	3.73895e-09	1.56724e-07	1.30645e-07	METTL1/PUS1/TRMT6/PUS7/DUS4L/POP7/NSUN2/POP1/RPP40/PTCD1	10
BP	GO:0006399	tRNA metabolic process	11/112	184/18493	1.53846e-08	6.27443e-07	5.23033e-07	METTL1/PUS1/TRMT6/PUS7/DUS4L/POP7/AIMP2/NSUN2/POP1/RPP40/PTCD1	11
BP	GO:0090502	RNA phosphodiester bond hydrolysis, endonucleolytic	8/112	76/18493	1.88245e-08	7.47532e-07	6.23139e-07	ZC3H12A/BOP1/POP7/RNASE2/POP1/RNASEH2A/RPP40/EXO1	8
BP	GO:0006304	DNA modification	9/112	112/18493	2.5855e-08	1.00039e-06	8.33918e-07	APOBEC3F/APOBEC3G/TDRD5/MOV10L1/DNMT3B/EXOSC5/EZH2/DNMT1/BRCA1	9
BP	GO:0043414	macromolecule methylation	13/112	300/18493	3.35994e-08	1.26754e-06	1.05661e-06	METTL1/HENMT1/TDRD5/NOP2/TRMT6/NSUN5/MOV10L1/DNMT3B/EZH2/NSUN2/DNMT1/SNRPB/BRCA1	13
BP	GO:0044766	multi-organism transport	6/112	33/18493	4.17944e-08	1.50161e-06	1.25174e-06	ALYREF/RAN/THOC3/XPO1/THOC6/IFIT1	6
BP	GO:1902579	multi-organism localization	6/112	33/18493	4.17944e-08	1.50161e-06	1.25174e-06	ALYREF/RAN/THOC3/XPO1/THOC6/IFIT1	6
BP	GO:0044728	DNA methylation or demethylation	8/112	93/18493	9.33755e-08	3.27683e-06	2.73155e-06	APOBEC3F/APOBEC3G/TDRD5/MOV10L1/DNMT3B/EZH2/DNMT1/BRCA1	8
BP	GO:0051607	defense response to virus	11/112	228/18493	1.384e-07	4.7465e-06	3.95666e-06	ZC3H12A/APOBEC3F/APOBEC3G/OAS1/OAS2/OAS3/RNASE2/EXOSC5/IFIT1/IFIT2/IFIT3	11
BP	GO:0032259	methylation	13/112	358/18493	2.60931e-07	8.7499e-06	7.29387e-06	METTL1/HENMT1/TDRD5/NOP2/TRMT6/NSUN5/MOV10L1/DNMT3B/EZH2/NSUN2/DNMT1/SNRPB/BRCA1	13
BP	GO:0006353	DNA-templated transcription, termination	7/112	74/18493	3.18617e-07	1.0452e-05	8.71276e-06	NCBP2/CD3EAP/SNRPG/SNRPF/SNRPB/SMN1/TTF2	7
BP	GO:0006402	mRNA catabolic process	12/112	307/18493	3.55196e-07	1.14041e-05	9.50636e-06	NCBP2/ZC3H12A/EIF4A3/IGF2BP1/IGF2BP3/PNPT1/DHX34/EXOSC5/HELZ2/XPO1/MAGOH/MAGOHB	12
BP	GO:1903311	regulation of mRNA metabolic process	11/112	264/18493	5.99077e-07	1.88335e-05	1.56995e-05	NCBP2/ZC3H12A/IGF2BP1/IGF2BP3/BARD1/PNPT1/DHX34/EXOSC5/XPO1/MAGOH/SF3B4	11
BP	GO:0000245	spliceosomal complex assembly	7/112	84/18493	7.63046e-07	2.34987e-05	1.95884e-05	SNRPD2/SNRPD1/SNRPC/SNRPG/ISY1/SMN1/GEMIN2	7
BP	GO:0045071	negative regulation of viral genome replication	6/112	53/18493	7.85179e-07	2.36967e-05	1.97534e-05	ZC3H12A/APOBEC3F/APOBEC3G/OAS1/OAS3/IFIT1	6
BP	GO:0006417	regulation of translation	13/112	402/18493	9.67247e-07	2.86191e-05	2.38568e-05	NCBP2/TCOF1/ZC3H12A/EIF6/EIF5A/BOLL/PUS7/EIF4A3/IGF2BP1/IGF2BP3/GAPDH/MRPL13/MAGOH	13
BP	GO:0045069	regulation of viral genome replication	7/112	90/18493	1.22171e-06	3.5453e-05	2.95534e-05	ZC3H12A/APOBEC3F/APOBEC3G/OAS1/OAS3/PPIH/IFIT1	7
BP	GO:0006369	termination of RNA polymerase II transcription	5/112	34/18493	1.80143e-06	5.12897e-05	4.27548e-05	NCBP2/SNRPG/SNRPF/SNRPB/TTF2	5
BP	GO:0009615	response to virus	11/112	315/18493	3.34747e-06	9.35433e-05	7.79772e-05	ZC3H12A/APOBEC3F/APOBEC3G/OAS1/OAS2/OAS3/RNASE2/EXOSC5/IFIT1/IFIT2/IFIT3	11
BP	GO:0034248	regulation of cellular amide metabolic process	13/112	453/18493	3.61533e-06	9.91915e-05	8.26856e-05	NCBP2/TCOF1/ZC3H12A/EIF6/EIF5A/BOLL/PUS7/EIF4A3/IGF2BP1/IGF2BP3/GAPDH/MRPL13/MAGOH	13
BP	GO:0006305	DNA alkylation	6/112	71/18493	4.48391e-06	0.000118706	9.89524e-05	TDRD5/MOV10L1/DNMT3B/EZH2/DNMT1/BRCA1	6
BP	GO:0006306	DNA methylation	6/112	71/18493	4.48391e-06	0.000118706	9.89524e-05	TDRD5/MOV10L1/DNMT3B/EZH2/DNMT1/BRCA1	6
BP	GO:0034504	protein localization to nucleus	10/112	269/18493	5.51712e-06	0.00014354	0.000119654	ZC3H12A/IPO4/BARD1/DKC1/NXT1/RAN/NUTF2/XPO1/TERT/WRAP53	10
BP	GO:0016556	mRNA modification	4/112	21/18493	7.04686e-06	0.000178299	0.000148629	PUS1/TRMT6/PUS7/DKC1	4
BP	GO:0019079	viral genome replication	7/112	117/18493	7.09215e-06	0.000178299	0.000148629	ZC3H12A/APOBEC3F/APOBEC3G/OAS1/OAS3/PPIH/IFIT1	7
BP	GO:1903901	negative regulation of viral life cycle	6/112	77/18493	7.20759e-06	0.000178299	0.000148629	ZC3H12A/APOBEC3F/APOBEC3G/OAS1/OAS3/IFIT1	6
BP	GO:0001510	RNA methylation	6/112	78/18493	7.77002e-06	0.000189112	0.000157643	METTL1/HENMT1/NOP2/TRMT6/NSUN5/NSUN2	6
BP	GO:0006400	tRNA modification	6/112	82/18493	1.03869e-05	0.000248792	0.000207392	METTL1/PUS1/TRMT6/PUS7/DUS4L/NSUN2	6
BP	GO:0008334	histone mRNA metabolic process	4/112	25/18493	1.46187e-05	0.000344681	0.000287324	NCBP2/SNRPG/SNRPF/SNRPB	4
BP	GO:0060337	type I interferon signaling pathway	6/112	89/18493	1.66559e-05	0.000380815	0.000317445	OAS1/OAS2/OAS3/IFIT1/IFIT2/IFIT3	6
BP	GO:0071357	cellular response to type I interferon	6/112	89/18493	1.66559e-05	0.000380815	0.000317445	OAS1/OAS2/OAS3/IFIT1/IFIT2/IFIT3	6
BP	GO:0048525	negative regulation of viral process	6/112	91/18493	1.89189e-05	0.0004261	0.000355194	ZC3H12A/APOBEC3F/APOBEC3G/OAS1/OAS3/IFIT1	6
BP	GO:0034340	response to type I interferon	6/112	94/18493	2.27724e-05	0.000493941	0.000411747	OAS1/OAS2/OAS3/IFIT1/IFIT2/IFIT3	6
BP	GO:0061013	regulation of mRNA catabolic process	7/112	140/18493	2.29131e-05	0.000493941	0.000411747	ZC3H12A/IGF2BP1/IGF2BP3/PNPT1/DHX34/EXOSC5/XPO1	7
BP	GO:1903900	regulation of viral life cycle	7/112	140/18493	2.29131e-05	0.000493941	0.000411747	ZC3H12A/APOBEC3F/APOBEC3G/OAS1/OAS3/PPIH/IFIT1	7
BP	GO:0017148	negative regulation of translation	8/112	196/18493	2.56032e-05	0.000544157	0.000453607	ZC3H12A/EIF6/PUS7/EIF4A3/IGF2BP1/IGF2BP3/GAPDH/MRPL13	8
BP	GO:0010586	miRNA metabolic process	4/112	29/18493	2.69396e-05	0.000564609	0.000470655	ZC3H12A/XPO5/PNPT1/RAN	4
BP	GO:0043903	regulation of symbiosis, encompassing mutualism through parasitism	8/112	203/18493	3.29023e-05	0.000680131	0.000566954	ZC3H12A/APOBEC3F/APOBEC3G/OAS1/OAS3/GAPDH/PPIH/IFIT1	8
BP	GO:0051573	negative regulation of histone H3-K9 methylation	3/112	11/18493	3.44417e-05	0.000702331	0.00058546	DNMT3B/DNMT1/BRCA1	3
BP	GO:0034661	ncRNA catabolic process	4/112	31/18493	3.53577e-05	0.000711397	0.000593017	ZC3H12A/PNPT1/EXOSC5/POP1	4
BP	GO:0000956	nuclear-transcribed mRNA catabolic process	8/112	207/18493	3.78036e-05	0.0007506	0.000625697	NCBP2/ZC3H12A/EIF4A3/DHX34/EXOSC5/HELZ2/MAGOH/MAGOHB	8
BP	GO:0034249	negative regulation of cellular amide metabolic process	8/112	213/18493	4.62907e-05	0.000907177	0.000756218	ZC3H12A/EIF6/PUS7/EIF4A3/IGF2BP1/IGF2BP3/GAPDH/MRPL13	8
BP	GO:0000723	telomere maintenance	7/112	157/18493	4.77708e-05	0.000924182	0.000770393	PRKDC/DKC1/PTGES3/PRIM1/TERT/EXO1/WRAP53	7
BP	GO:0045006	DNA deamination	3/112	13/18493	5.91733e-05	0.00113029	0.0009422	APOBEC3F/APOBEC3G/EXOSC5	3
BP	GO:0046822	regulation of nucleocytoplasmic transport	6/112	112/18493	6.12659e-05	0.00115563	0.000963326	NCBP2/ZC3H12A/XPO5/BARD1/NUTF2/XPO1	6
BP	GO:0050691	regulation of defense response to virus by host	4/112	36/18493	6.4667e-05	0.00120472	0.00100425	ZC3H12A/APOBEC3F/APOBEC3G/IFIT1	4
BP	GO:0019058	viral life cycle	9/112	289/18493	6.61182e-05	0.00121674	0.00101427	ZC3H12A/APOBEC3F/APOBEC3G/OAS1/OAS3/RAN/PPIH/XPO1/IFIT1	9
BP	GO:0016246	RNA interference	3/112	14/18493	7.49794e-05	0.00136318	0.00113634	XPO5/HENMT1/TERT	3
BP	GO:0032200	telomere organization	7/112	170/18493	7.89968e-05	0.00141912	0.00118297	PRKDC/DKC1/PTGES3/PRIM1/TERT/EXO1/WRAP53	7
BP	GO:0000184	nuclear-transcribed mRNA catabolic process, nonsense-mediated decay	6/112	120/18493	8.99503e-05	0.00159688	0.00133115	NCBP2/EIF4A3/DHX34/HELZ2/MAGOH/MAGOHB	6
BP	GO:0000054	ribosomal subunit export from nucleus	3/112	15/18493	9.3311e-05	0.00161846	0.00134914	EIF6/RAN/XPO1	3
BP	GO:0033750	ribosome localization	3/112	15/18493	9.3311e-05	0.00161846	0.00134914	EIF6/RAN/XPO1	3
BP	GO:0090503	RNA phosphodiester bond hydrolysis, exonucleolytic	4/112	40/18493	9.8477e-05	0.00168866	0.00140766	ZC3H12A/PNPT1/EXOSC5/ERI1	4
BP	GO:0050792	regulation of viral process	7/112	177/18493	0.00010172	0.00172467	0.00143768	ZC3H12A/APOBEC3F/APOBEC3G/OAS1/OAS3/PPIH/IFIT1	7
BP	GO:0051571	positive regulation of histone H3-K4 methylation	3/112	16/18493	0.000114338	0.001896	0.0015805	DNMT3B/DNMT1/BRCA1	3
BP	GO:0070200	establishment of protein localization to telomere	3/112	16/18493	0.000114338	0.001896	0.0015805	DKC1/TERT/WRAP53	3
BP	GO:0043487	regulation of RNA stability	6/112	126/18493	0.000117777	0.00193179	0.00161033	ZC3H12A/IGF2BP1/IGF2BP3/DKC1/EXOSC5/XPO1	6
BP	GO:0001522	pseudouridine synthesis	3/112	17/18493	0.000138227	0.00221899	0.00184974	PUS1/PUS7/DKC1	3
BP	GO:0071428	rRNA-containing ribonucleoprotein complex export from nucleus	3/112	17/18493	0.000138227	0.00221899	0.00184974	EIF6/RAN/XPO1	3
BP	GO:0006414	translational elongation	6/112	134/18493	0.000165066	0.00262194	0.00218564	MRPL36/EIF5A/MRPL47/EIF4A3/MRPL13/MRPL14	6
BP	GO:0000966	RNA 5'-end processing	3/112	19/18493	0.000195242	0.00294621	0.00245594	PNPT1/POP7/POP1	3
BP	GO:0090670	RNA localization to Cajal body	3/112	19/18493	0.000195242	0.00294621	0.00245594	RUVBL1/DKC1/WRAP53	3
BP	GO:0090671	telomerase RNA localization to Cajal body	3/112	19/18493	0.000195242	0.00294621	0.00245594	RUVBL1/DKC1/WRAP53	3
BP	GO:0090672	telomerase RNA localization	3/112	19/18493	0.000195242	0.00294621	0.00245594	RUVBL1/DKC1/WRAP53	3
BP	GO:0090685	RNA localization to nucleus	3/112	19/18493	0.000195242	0.00294621	0.00245594	RUVBL1/DKC1/WRAP53	3
BP	GO:0043628	ncRNA 3'-end processing	4/112	48/18493	0.000202004	0.00301806	0.00251584	DKC1/EXOSC5/ERI1/PTCD1	4
BP	GO:0031061	negative regulation of histone methylation	3/112	20/18493	0.000228686	0.00335035	0.00279284	DNMT3B/DNMT1/BRCA1	3
BP	GO:0035458	cellular response to interferon-beta	3/112	20/18493	0.000228686	0.00335035	0.00279284	PNPT1/IFIT1/IFIT3	3
BP	GO:0032069	regulation of nuclease activity	3/112	22/18493	0.000306213	0.00444303	0.00370368	OAS1/OAS2/OAS3	3
BP	GO:0051570	regulation of histone H3-K9 methylation	3/112	23/18493	0.000350595	0.00503855	0.00420011	DNMT3B/DNMT1/BRCA1	3
BP	GO:0006415	translational termination	5/112	101/18493	0.000371641	0.00529063	0.00441024	MRPL36/EIF5A/MRPL47/MRPL13/MRPL14	5
BP	GO:0140053	mitochondrial gene expression	6/112	159/18493	0.000415186	0.00585529	0.00488094	MRPL36/MRPL47/PUS1/PNPT1/MRPL13/MRPL14	6
BP	GO:0043900	regulation of multi-organism process	9/112	371/18493	0.000426894	0.00596466	0.00497211	ZC3H12A/APOBEC3F/APOBEC3G/OAS1/OAS3/RNASE10/GAPDH/PPIH/IFIT1	9
BP	GO:0002230	positive regulation of defense response to virus by host	3/112	25/18493	0.000451322	0.00619132	0.00516105	ZC3H12A/APOBEC3F/APOBEC3G	3
BP	GO:0070199	establishment of protein localization to chromosome	3/112	25/18493	0.000451322	0.00619132	0.00516105	DKC1/TERT/WRAP53	3
BP	GO:0000729	DNA double-strand break processing	3/112	26/18493	0.000507947	0.00684368	0.00570486	BARD1/BRCA1/EXO1	3
BP	GO:0051569	regulation of histone H3-K4 methylation	3/112	26/18493	0.000507947	0.00684368	0.00570486	DNMT3B/DNMT1/BRCA1	3
BP	GO:0043901	negative regulation of multi-organism process	6/112	169/18493	0.000573435	0.00763448	0.00636406	ZC3H12A/APOBEC3F/APOBEC3G/OAS1/OAS3/IFIT1	6
BP	GO:0042255	ribosome assembly	4/112	63/18493	0.00057676	0.00763448	0.00636406	BOP1/EIF6/BRIX1/NOP2	4
BP	GO:0035456	response to interferon-beta	3/112	28/18493	0.000634401	0.00825268	0.00687939	PNPT1/IFIT1/IFIT3	3
BP	GO:0070198	protein localization to chromosome, telomeric region	3/112	28/18493	0.000634401	0.00825268	0.00687939	DKC1/TERT/WRAP53	3
BP	GO:0043488	regulation of mRNA stability	5/112	118/18493	0.000756797	0.00976074	0.0081365	ZC3H12A/IGF2BP1/IGF2BP3/EXOSC5/XPO1	5
BP	GO:0050688	regulation of defense response to virus	4/112	68/18493	0.000770459	0.00985274	0.00821319	ZC3H12A/APOBEC3F/APOBEC3G/IFIT1	4
BP	GO:0007004	telomere maintenance via telomerase	4/112	71/18493	0.000906533	0.0114954	0.00958254	DKC1/PTGES3/TERT/WRAP53	4
BP	GO:0007281	germ cell development	7/112	255/18493	0.000924979	0.0116316	0.00969606	BOLL/TDRD5/MOV10L1/RAN/NSUN2/RNF17/PABPC1L	7
BP	GO:0000027	ribosomal large subunit assembly	3/112	32/18493	0.000943749	0.0116731	0.00973063	BOP1/BRIX1/NOP2	3
BP	GO:0051567	histone H3-K9 methylation	3/112	32/18493	0.000943749	0.0116731	0.00973063	DNMT3B/DNMT1/BRCA1	3
BP	GO:0042273	ribosomal large subunit biogenesis	4/112	73/18493	0.00100613	0.0123436	0.0102895	BOP1/EIF6/BRIX1/NOP2	4
BP	GO:0000462	maturation of SSU-rRNA from tricistronic rRNA transcript (SSU-rRNA, 5.8S rRNA, LSU-rRNA)	3/112	33/18493	0.00103357	0.0125779	0.0104848	BYSL/HEATR1/DCAF13	3
BP	GO:1903313	positive regulation of mRNA metabolic process	4/112	75/18493	0.00111319	0.0134235	0.0111897	NCBP2/ZC3H12A/PNPT1/SF3B4	4
BP	GO:0060249	anatomical structure homeostasis	9/112	425/18493	0.00112085	0.0134235	0.0111897	PRDX1/BARD1/PRKDC/DKC1/PTGES3/PRIM1/TERT/EXO1/WRAP53	9
BP	GO:0000154	rRNA modification	3/112	35/18493	0.00122901	0.014603	0.012173	NOP2/NSUN5/DKC1	3
BP	GO:0006278	RNA-dependent DNA biosynthetic process	4/112	78/18493	0.00128839	0.0150712	0.0125633	DKC1/PTGES3/TERT/WRAP53	4
BP	GO:1900182	positive regulation of protein localization to nucleus	4/112	78/18493	0.00128839	0.0150712	0.0125633	ZC3H12A/DKC1/NUTF2/TERT	4
BP	GO:0051973	positive regulation of telomerase activity	3/112	36/18493	0.00133486	0.0154947	0.0129163	DKC1/PTGES3/WRAP53	3
BP	GO:0030488	tRNA methylation	3/112	37/18493	0.00144627	0.0166598	0.0138875	METTL1/TRMT6/NSUN2	3
BP	GO:0034502	protein localization to chromosome	4/112	81/18493	0.00148202	0.0169422	0.014123	DKC1/EZH2/TERT/WRAP53	4
BP	GO:0031062	positive regulation of histone methylation	3/112	38/18493	0.00156336	0.0169609	0.0141385	DNMT3B/DNMT1/BRCA1	3
BP	GO:0000055	ribosomal large subunit export from nucleus	2/112	10/18493	0.00158481	0.0169609	0.0141385	RAN/XPO1	2
BP	GO:0001682	tRNA 5'-leader removal	2/112	10/18493	0.00158481	0.0169609	0.0141385	POP7/POP1	2
BP	GO:0010587	miRNA catabolic process	2/112	10/18493	0.00158481	0.0169609	0.0141385	ZC3H12A/PNPT1	2
BP	GO:0035457	cellular response to interferon-alpha	2/112	10/18493	0.00158481	0.0169609	0.0141385	IFIT2/IFIT3	2
BP	GO:1903405	protein localization to nuclear body	2/112	10/18493	0.00158481	0.0169609	0.0141385	DKC1/WRAP53	2
BP	GO:1904851	positive regulation of establishment of protein localization to telomere	2/112	10/18493	0.00158481	0.0169609	0.0141385	DKC1/WRAP53	2
BP	GO:1904867	protein localization to Cajal body	2/112	10/18493	0.00158481	0.0169609	0.0141385	DKC1/WRAP53	2
BP	GO:2000628	regulation of miRNA metabolic process	2/112	10/18493	0.00158481	0.0169609	0.0141385	ZC3H12A/PNPT1	2
BP	GO:0010833	telomere maintenance via telomere lengthening	4/112	83/18493	0.00162184	0.0172349	0.0143669	DKC1/PTGES3/TERT/WRAP53	4
BP	GO:0046825	regulation of protein export from nucleus	3/112	39/18493	0.00168622	0.0177937	0.0148328	XPO5/BARD1/XPO1	3
BP	GO:0051701	interaction with host	6/112	209/18493	0.00171802	0.0180034	0.0150075	ZC3H12A/ALYREF/GAPDH/THOC3/THOC6/IFIT1	6
BP	GO:0006303	double-strand break repair via nonhomologous end joining	4/112	85/18493	0.00177058	0.0184262	0.01536	BARD1/PRKDC/BRCA1/WRAP53	4
BP	GO:0031057	negative regulation of histone modification	3/112	40/18493	0.00181496	0.0187587	0.0156371	DNMT3B/DNMT1/BRCA1	3
BP	GO:0070203	regulation of establishment of protein localization to telomere	2/112	11/18493	0.00192934	0.0196715	0.016398	DKC1/WRAP53	2
BP	GO:0070475	rRNA base methylation	2/112	11/18493	0.00192934	0.0196715	0.016398	NOP2/NSUN5	2
BP	GO:0070125	mitochondrial translational elongation	4/112	88/18493	0.00201104	0.0203669	0.0169777	MRPL36/MRPL47/MRPL13/MRPL14	4
BP	GO:0061647	histone H3-K9 modification	3/112	42/18493	0.00209045	0.0209458	0.0174604	DNMT3B/DNMT1/BRCA1	3
BP	GO:0070126	mitochondrial translational termination	4/112	89/18493	0.00209597	0.0209458	0.0174604	MRPL36/MRPL47/MRPL13/MRPL14	4
BP	GO:0030490	maturation of SSU-rRNA	3/112	43/18493	0.0022374	0.0214806	0.0179061	BYSL/HEATR1/DCAF13	3
BP	GO:0006216	cytidine catabolic process	2/112	12/18493	0.00230606	0.0214806	0.0179061	APOBEC3F/APOBEC3G	2
BP	GO:0009972	cytidine deamination	2/112	12/18493	0.00230606	0.0214806	0.0179061	APOBEC3F/APOBEC3G	2
BP	GO:0016554	cytidine to uridine editing	2/112	12/18493	0.00230606	0.0214806	0.0179061	APOBEC3F/APOBEC3G	2
BP	GO:0031126	snoRNA 3'-end processing	2/112	12/18493	0.00230606	0.0214806	0.0179061	DKC1/EXOSC5	2
BP	GO:0045091	regulation of single stranded viral RNA replication via double stranded DNA intermediate	2/112	12/18493	0.00230606	0.0214806	0.0179061	APOBEC3F/APOBEC3G	2
BP	GO:0046087	cytidine metabolic process	2/112	12/18493	0.00230606	0.0214806	0.0179061	APOBEC3F/APOBEC3G	2
BP	GO:0070202	regulation of establishment of protein localization to chromosome	2/112	12/18493	0.00230606	0.0214806	0.0179061	DKC1/WRAP53	2
BP	GO:1902570	protein localization to nucleolus	2/112	12/18493	0.00230606	0.0214806	0.0179061	RAN/TERT	2
BP	GO:1904816	positive regulation of protein localization to chromosome, telomeric region	2/112	12/18493	0.00230606	0.0214806	0.0179061	DKC1/WRAP53	2
BP	GO:1990173	protein localization to nucleoplasm	2/112	12/18493	0.00230606	0.0214806	0.0179061	DKC1/WRAP53	2
BP	GO:0000726	non-recombinational repair	4/112	92/18493	0.00236559	0.0218998	0.0182556	BARD1/PRKDC/BRCA1/WRAP53	4
BP	GO:0006606	protein import into nucleus	5/112	157/18493	0.00267703	0.0246319	0.0205331	ZC3H12A/IPO4/NXT1/RAN/NUTF2	5
BP	GO:0039692	single stranded viral RNA replication via double stranded DNA intermediate	2/112	13/18493	0.00271459	0.0248262	0.020695	APOBEC3F/APOBEC3G	2
BP	GO:0051972	regulation of telomerase activity	3/112	48/18493	0.00306776	0.0277201	0.0231073	DKC1/PTGES3/WRAP53	3
BP	GO:2000772	regulation of cellular senescence	3/112	48/18493	0.00306776	0.0277201	0.0231073	PRKDC/PNPT1/TERT	3
BP	GO:0043144	snoRNA processing	2/112	14/18493	0.00315453	0.0278373	0.023205	DKC1/EXOSC5	2
BP	GO:0046133	pyrimidine ribonucleoside catabolic process	2/112	14/18493	0.00315453	0.0278373	0.023205	APOBEC3F/APOBEC3G	2
BP	GO:0099116	tRNA 5'-end processing	2/112	14/18493	0.00315453	0.0278373	0.023205	POP7/POP1	2
BP	GO:1904814	regulation of protein localization to chromosome, telomeric region	2/112	14/18493	0.00315453	0.0278373	0.023205	DKC1/WRAP53	2
BP	GO:0031050	dsRNA processing	3/112	49/18493	0.00325356	0.0283793	0.0236568	ZC3H12A/HENMT1/TERT	3
BP	GO:0070918	production of small RNA involved in gene silencing by RNA	3/112	49/18493	0.00325356	0.0283793	0.0236568	ZC3H12A/HENMT1/TERT	3
BP	GO:1902369	negative regulation of RNA catabolic process	3/112	50/18493	0.00344611	0.0298861	0.0249129	IGF2BP1/DKC1/DHX34	3
BP	GO:0000963	mitochondrial RNA processing	2/112	15/18493	0.00362548	0.0307351	0.0256206	PUS1/PNPT1	2
BP	GO:0060149	negative regulation of posttranscriptional gene silencing	2/112	15/18493	0.00362548	0.0307351	0.0256206	ZC3H12A/TERT	2
BP	GO:0060967	negative regulation of gene silencing by RNA	2/112	15/18493	0.00362548	0.0307351	0.0256206	ZC3H12A/TERT	2
BP	GO:1904874	positive regulation of telomerase RNA localization to Cajal body	2/112	15/18493	0.00362548	0.0307351	0.0256206	RUVBL1/DKC1	2
BP	GO:0006479	protein methylation	5/112	174/18493	0.00415495	0.0348324	0.0290361	DNMT3B/EZH2/DNMT1/SNRPB/BRCA1	5
BP	GO:0008213	protein alkylation	5/112	174/18493	0.00415495	0.0348324	0.0290361	DNMT3B/EZH2/DNMT1/SNRPB/BRCA1	5
BP	GO:0051568	histone H3-K4 methylation	3/112	54/18493	0.00428544	0.0357277	0.0297825	DNMT3B/DNMT1/BRCA1	3
BP	GO:0034968	histone lysine methylation	4/112	110/18493	0.00449845	0.0372976	0.0310911	DNMT3B/EZH2/DNMT1/BRCA1	4
BP	GO:0034471	ncRNA 5'-end processing	2/112	17/18493	0.00465892	0.0382082	0.0318502	POP7/POP1	2
BP	GO:0075733	intracellular transport of virus	2/112	17/18493	0.00465892	0.0382082	0.0318502	RAN/XPO1	2
BP	GO:0090342	regulation of cell aging	3/112	56/18493	0.00474755	0.0387246	0.0322806	PRKDC/PNPT1/TERT	3
BP	GO:0034587	piRNA metabolic process	2/112	18/18493	0.00522064	0.0421281	0.0351177	HENMT1/MOV10L1	2
BP	GO:1904872	regulation of telomerase RNA localization to Cajal body	2/112	18/18493	0.00522064	0.0421281	0.0351177	RUVBL1/DKC1	2
BP	GO:0060968	regulation of gene silencing	4/112	115/18493	0.00526434	0.0422547	0.0352233	ZC3H12A/XPO5/DNMT1/TERT	4
BP	GO:0022412	cellular process involved in reproduction in multicellular organism	7/112	350/18493	0.00544333	0.0434603	0.0362282	BOLL/TDRD5/MOV10L1/RAN/NSUN2/RNF17/PABPC1L	7
BP	GO:1905268	negative regulation of chromatin organization	3/112	60/18493	0.00575929	0.0455914	0.0380048	DNMT3B/DNMT1/BRCA1	3
BP	GO:0006448	regulation of translational elongation	2/112	19/18493	0.00581187	0.0455914	0.0380048	EIF5A/EIF4A3	2
BP	GO:0016074	snoRNA metabolic process	2/112	19/18493	0.00581187	0.0455914	0.0380048	DKC1/EXOSC5	2
BP	GO:0006260	DNA replication	6/112	268/18493	0.00583111	0.0455914	0.0380048	ALYREF/BARD1/PRIM1/BRCA1/RNASEH2A/EXO1	6
BP	GO:0045727	positive regulation of translation	4/112	120/18493	0.00611307	0.0475496	0.0396371	EIF6/EIF5A/BOLL/EIF4A3	4
BP	GO:1900180	regulation of protein localization to nucleus	4/112	121/18493	0.00629308	0.0485311	0.0404553	ZC3H12A/DKC1/NUTF2/TERT	4
BP	GO:0016553	base conversion or substitution editing	2/112	20/18493	0.00643222	0.0485311	0.0404553	APOBEC3F/APOBEC3G	2
BP	GO:0035455	response to interferon-alpha	2/112	20/18493	0.00643222	0.0485311	0.0404553	IFIT2/IFIT3	2
BP	GO:0043046	DNA methylation involved in gamete generation	2/112	20/18493	0.00643222	0.0485311	0.0404553	TDRD5/MOV10L1	2
BP	GO:0046794	transport of virus	2/112	20/18493	0.00643222	0.0485311	0.0404553	RAN/XPO1	2
BP	GO:0070920	regulation of production of small RNA involved in gene silencing by RNA	2/112	20/18493	0.00643222	0.0485311	0.0404553	ZC3H12A/TERT	2
BP	GO:0031060	regulation of histone methylation	3/112	63/18493	0.00659652	0.049278	0.0410779	DNMT3B/DNMT1/BRCA1	3
BP	GO:0042274	ribosomal small subunit biogenesis	3/112	63/18493	0.00659652	0.049278	0.0410779	BYSL/HEATR1/DCAF13	3
CC	GO:0005681	spliceosomal complex	17/115	179/19659	3.78326e-16	8.02051e-14	5.53551e-14	SNRPD2/ALYREF/EIF4A3/SNRPD1/SNRPC/SNRPG/SNRPF/ISY1/PPIH/SNRPB/TTF2/EFTUD2/GEMIN2/PRPF4/MAGOH/MAGOHB/SF3B4	17
CC	GO:0036464	cytoplasmic ribonucleoprotein granule	15/115	207/19659	1.23731e-12	1.31155e-10	9.05188e-11	PSMA6/ZC3H12A/HENMT1/APOBEC3F/APOBEC3G/TDRD5/IGF2BP1/MOV10L1/BARD1/SNRPG/NSUN2/SMN1/PABPC1L/MEX3A/MEX3B	15
CC	GO:0035770	ribonucleoprotein granule	15/115	219/19659	2.80003e-12	1.72301e-10	1.18916e-10	PSMA6/ZC3H12A/HENMT1/APOBEC3F/APOBEC3G/TDRD5/IGF2BP1/MOV10L1/BARD1/SNRPG/NSUN2/SMN1/PABPC1L/MEX3A/MEX3B	15
CC	GO:0071013	catalytic step 2 spliceosome	11/115	87/19659	3.25095e-12	1.72301e-10	1.18916e-10	SNRPD2/ALYREF/EIF4A3/SNRPD1/SNRPG/SNRPF/ISY1/SNRPB/EFTUD2/MAGOH/MAGOHB	11
CC	GO:0034719	SMN-Sm protein complex	7/115	18/19659	5.87904e-12	2.49271e-10	1.72039e-10	SNRPD2/SNRPD1/SNRPG/SNRPF/SNRPB/SMN1/GEMIN2	7
CC	GO:0120114	Sm-like protein family complex	11/115	117/19659	8.70303e-11	3.07507e-09	2.12232e-09	SNRPD2/SNRPD1/SNRPC/SNRPG/SNRPF/PPIH/SNRPB/SMN1/EFTUD2/GEMIN2/PRPF4	11
CC	GO:0015030	Cajal body	9/115	75/19659	5.30989e-10	1.60814e-08	1.10989e-08	LSG1/RDM1/SNRPC/DKC1/SMN1/XPO1/EFTUD2/PRPF4/WRAP53	9
CC	GO:0044452	nucleolar part	12/115	180/19659	6.52894e-10	1.73017e-08	1.19411e-08	TCOF1/CD3EAP/BOP1/RRP9/POP7/DKC1/HEATR1/RAE1/NOP56/UTP18/POP1/RPP40	12
CC	GO:0034709	methylosome	5/115	12/19659	4.81009e-09	1.13304e-07	7.81991e-08	SNRPD2/SNRPD1/SNRPG/SNRPF/SNRPB	5
CC	GO:0097525	spliceosomal snRNP complex	9/115	99/19659	6.5119e-09	1.38052e-07	9.52794e-08	SNRPD2/SNRPD1/SNRPC/SNRPG/SNRPF/PPIH/SNRPB/EFTUD2/PRPF4	9
CC	GO:0005687	U4 snRNP	5/115	13/19659	7.77996e-09	1.49941e-07	1.03485e-07	SNRPD2/SNRPD1/SNRPG/SNRPF/SNRPB	5
CC	GO:0005689	U12-type spliceosomal complex	6/115	27/19659	9.40694e-09	1.66189e-07	1.14699e-07	SNRPD2/SNRPD1/SNRPG/SNRPF/SNRPB/SF3B4	6
CC	GO:0030684	preribosome	8/115	73/19659	1.04995e-08	1.6875e-07	1.16466e-07	BYSL/BOP1/EIF6/RRP9/HEATR1/NOP56/UTP18/DCAF13	8
CC	GO:0005732	small nucleolar ribonucleoprotein complex	6/115	28/19659	1.19156e-08	1.6875e-07	1.16466e-07	RRP9/POP7/DKC1/SNRPF/NOP56/POP1	6
CC	GO:0030532	small nuclear ribonucleoprotein complex	9/115	106/19659	1.19399e-08	1.6875e-07	1.16466e-07	SNRPD2/SNRPD1/SNRPC/SNRPG/SNRPF/PPIH/SNRPB/EFTUD2/PRPF4	9
CC	GO:0005684	U2-type spliceosomal complex	8/115	78/19659	1.78757e-08	2.36854e-07	1.63469e-07	SNRPD2/SNRPD1/SNRPC/SNRPG/SNRPF/SNRPB/EFTUD2/PRPF4	8
CC	GO:0034708	methyltransferase complex	9/115	116/19659	2.64028e-08	3.29258e-07	2.27244e-07	METTL1/SNRPD2/TRMT6/SNRPD1/RUVBL1/SNRPG/EZH2/SNRPF/SNRPB	9
CC	GO:0005685	U1 snRNP	6/115	37/19659	7.04465e-08	8.29703e-07	5.72635e-07	SNRPD2/SNRPD1/SNRPC/SNRPG/SNRPF/SNRPB	6
CC	GO:0005697	telomerase holoenzyme complex	5/115	21/19659	1.18499e-07	1.3222e-06	9.12545e-07	DKC1/PTGES3/SNRPB/TERT/WRAP53	5
CC	GO:0016607	nuclear speck	13/115	382/19659	3.75088e-07	3.97594e-06	2.74407e-06	RSRC1/ALYREF/EIF4A3/BARD1/DDX39A/NXT1/THOC3/PPIH/EFTUD2/TERT/THOC6/PRPF4/MAGOH	13
CC	GO:0071007	U2-type catalytic step 2 spliceosome	5/115	29/19659	6.66211e-07	6.72556e-06	4.64177e-06	SNRPD2/SNRPD1/SNRPF/SNRPB/EFTUD2	5
CC	GO:0032040	small-subunit processome	5/115	37/19659	2.35583e-06	2.27016e-05	1.56679e-05	RRP9/HEATR1/NOP56/UTP18/DCAF13	5
CC	GO:0046540	U4/U6 x U5 tri-snRNP complex	5/115	38/19659	2.70015e-06	2.38514e-05	1.64615e-05	SNRPD2/PPIH/SNRPB/EFTUD2/PRPF4	5
CC	GO:0097526	spliceosomal tri-snRNP complex	5/115	38/19659	2.70015e-06	2.38514e-05	1.64615e-05	SNRPD2/PPIH/SNRPB/EFTUD2/PRPF4	5
CC	GO:0043186	P granule	4/115	18/19659	3.19155e-06	2.50596e-05	1.72954e-05	HENMT1/TDRD5/MOV10L1/SNRPG	4
CC	GO:0045495	pole plasm	4/115	18/19659	3.19155e-06	2.50596e-05	1.72954e-05	HENMT1/TDRD5/MOV10L1/SNRPG	4
CC	GO:0060293	germ plasm	4/115	18/19659	3.19155e-06	2.50596e-05	1.72954e-05	HENMT1/TDRD5/MOV10L1/SNRPG	4
CC	GO:0035145	exon-exon junction complex	4/115	20/19659	5.00783e-06	3.79164e-05	2.61687e-05	ALYREF/EIF4A3/MAGOH/MAGOHB	4
CC	GO:0005682	U5 snRNP	4/115	22/19659	7.49285e-06	5.47753e-05	3.78042e-05	SNRPD2/SNRPD1/SNRPG/SNRPB	4
CC	GO:0000932	P-body	6/115	84/19659	9.85272e-06	6.96259e-05	4.80536e-05	PSMA6/ZC3H12A/APOBEC3F/APOBEC3G/MEX3A/MEX3B	6
CC	GO:0005643	nuclear pore	6/115	88/19659	1.2889e-05	8.81444e-05	6.08345e-05	EIF5A/XPOT/NXT1/RAN/NUTF2/RAE1	6
CC	GO:0005686	U2 snRNP	4/115	27/19659	1.75754e-05	0.000116437	8.03614e-05	SNRPD2/SNRPD1/SNRPG/SNRPB	4
CC	GO:0030681	multimeric ribonuclease P complex	3/115	10/19659	2.27109e-05	0.0001459	0.000100696	POP7/POP1/RPP40	3
CC	GO:0000781	chromosome, telomeric region	7/115	158/19659	4.01747e-05	0.000250501	0.000172888	ALYREF/PRKDC/PTGES3/THOC3/TERT/THOC6/WRAP53	7
CC	GO:0000346	transcription export complex	3/115	14/19659	6.77221e-05	0.000398808	0.000275245	ALYREF/THOC3/THOC6	3
CC	GO:0030677	ribonuclease P complex	3/115	14/19659	6.77221e-05	0.000398808	0.000275245	POP7/POP1/RPP40	3
CC	GO:0015934	large ribosomal subunit	6/115	121/19659	7.81799e-05	0.00044795	0.000309161	MRPL36/MRPL47/MRPL13/MRPL14/RPL39L/RPL22L1	6
CC	GO:0071004	U2-type prespliceosome	3/115	16/19659	0.000103302	0.000561538	0.000387556	SNRPC/SNRPG/SNRPB	3
CC	GO:0071010	prespliceosome	3/115	16/19659	0.000103302	0.000561538	0.000387556	SNRPC/SNRPG/SNRPB	3
CC	GO:0001650	fibrillar center	6/115	134/19659	0.000137306	0.000727719	0.000502249	TCOF1/CD3EAP/DKC1/HEATR1/RAE1/NOP56	6
CC	GO:0098687	chromosomal region	9/115	346/19659	0.000199836	0.0010333	0.00071315	ALYREF/PRKDC/PTGES3/THOC3/DNMT1/XPO1/TERT/THOC6/WRAP53	9
CC	GO:0000315	organellar large ribosomal subunit	4/115	57/19659	0.000345601	0.00170389	0.00117597	MRPL36/MRPL47/MRPL13/MRPL14	4
CC	GO:0005762	mitochondrial large ribosomal subunit	4/115	57/19659	0.000345601	0.00170389	0.00117597	MRPL36/MRPL47/MRPL13/MRPL14	4
CC	GO:0005635	nuclear envelope	10/115	461/19659	0.000378625	0.00182428	0.00125906	IPO4/EIF5A/GAPDH/XPOT/NXT1/RAN/NUTF2/RAE1/UTP18/XPO1	10
CC	GO:0018995	host	3/115	29/19659	0.000637711	0.00287648	0.00198526	RAN/XPO1/IFIT1	3
CC	GO:0030686	90S preribosome	3/115	29/19659	0.000637711	0.00287648	0.00198526	BOP1/HEATR1/UTP18	3
CC	GO:0043657	host cell	3/115	29/19659	0.000637711	0.00287648	0.00198526	RAN/XPO1/IFIT1	3
CC	GO:1902555	endoribonuclease complex	3/115	30/19659	0.000705559	0.00305262	0.00210682	POP7/POP1/RPP40	3
CC	GO:1905348	endonuclease complex	3/115	30/19659	0.000705559	0.00305262	0.00210682	POP7/POP1/RPP40	3
CC	GO:0000784	nuclear chromosome, telomeric region	5/115	124/19659	0.000812606	0.00344545	0.00237794	ALYREF/PRKDC/THOC3/TERT/THOC6	5
CC	GO:0044391	ribosomal subunit	6/115	191/19659	0.000910608	0.00378527	0.00261248	MRPL36/MRPL47/MRPL13/MRPL14/RPL39L/RPL22L1	6
CC	GO:0044215	other organism	3/115	35/19659	0.00111349	0.00437146	0.00301705	RAN/XPO1/IFIT1	3
CC	GO:0044216	other organism cell	3/115	35/19659	0.00111349	0.00437146	0.00301705	RAN/XPO1/IFIT1	3
CC	GO:0044217	other organism part	3/115	35/19659	0.00111349	0.00437146	0.00301705	RAN/XPO1/IFIT1	3
CC	GO:0005840	ribosome	7/115	276/19659	0.00120233	0.00463442	0.00319853	MRPL36/MRPL47/PNPT1/MRPL13/MRPL14/RPL39L/RPL22L1	7
CC	GO:0000313	organellar ribosome	4/115	87/19659	0.00170252	0.00633217	0.00437026	MRPL36/MRPL47/MRPL13/MRPL14	4
CC	GO:0005761	mitochondrial ribosome	4/115	87/19659	0.00170252	0.00633217	0.00437026	MRPL36/MRPL47/MRPL13/MRPL14	4
CC	GO:0032797	SMN complex	2/115	12/19659	0.00215478	0.00774261	0.00534371	SMN1/GEMIN2	2
CC	GO:0097504	Gemini of coiled bodies	2/115	12/19659	0.00215478	0.00774261	0.00534371	SMN1/GEMIN2	2
CC	GO:0033391	chromatoid body	2/115	13/19659	0.00253684	0.00896352	0.00618634	TDRD5/NSUN2	2
CC	GO:0000177	cytoplasmic exosome (RNase complex)	2/115	14/19659	0.00294837	0.0102468	0.00707201	PNPT1/EXOSC5	2
CC	GO:0030687	preribosome, large subunit precursor	2/115	22/19659	0.00725945	0.0248226	0.0171318	BOP1/EIF6	2
CC	GO:0034399	nuclear periphery	4/115	134/19659	0.00796726	0.0268105	0.0185037	PSMA6/IPO4/RUVBL1/XPOT	4
CC	GO:0000178	exosome (RNase complex)	2/115	25/19659	0.00932089	0.0304004	0.0209814	PNPT1/EXOSC5	2
CC	GO:1905354	exoribonuclease complex	2/115	25/19659	0.00932089	0.0304004	0.0209814	PNPT1/EXOSC5	2
CC	GO:0071005	U2-type precatalytic spliceosome	2/115	27/19659	0.0108229	0.0342456	0.0236352	SNRPB/PRPF4	2
CC	GO:0071011	precatalytic spliceosome	2/115	27/19659	0.0108229	0.0342456	0.0236352	SNRPB/PRPF4	2
MF	GO:0140098	catalytic activity, acting on RNA	26/115	352/17632	2.23755e-20	4.76597e-18	3.29744e-18	ZC3H12A/CD3EAP/METTL1/HENMT1/NOP2/PUS1/DUS4L/EIF4A3/MOV10L1/PNPT1/POP7/RNASE2/RNASE3/DHX34/EXOSC5/HELZ2/ISY1/NSUN2/ERI1/PRIM1/TERT/POP1/RNASEH2A/RPP40/EXO1/PTRH2	26
MF	GO:0004540	ribonuclease activity	11/115	112/17632	1.68751e-10	1.79719e-08	1.24343e-08	ZC3H12A/PNPT1/POP7/RNASE2/RNASE3/EXOSC5/ERI1/POP1/RNASEH2A/RPP40/EXO1	11
MF	GO:0043021	ribonucleoprotein complex binding	10/115	128/17632	1.11571e-08	7.92154e-07	5.48068e-07	ZC3H12A/BOP1/EIF6/EIF5A/EIF4A3/SNRPD1/SNRPC/EZH2/PPIH/ERI1	10
MF	GO:0004518	nuclease activity	11/115	202/17632	8.55502e-08	4.06431e-06	2.81198e-06	ZC3H12A/PNPT1/POP7/RNASE2/RNASE3/EXOSC5/ERI1/POP1/RNASEH2A/RPP40/EXO1	11
MF	GO:0000049	tRNA binding	7/115	58/17632	9.54064e-08	4.06431e-06	2.81198e-06	XPO5/METTL1/PUS1/XPOT/NSUN2/TERT/PTCD1	7
MF	GO:0004521	endoribonuclease activity	7/115	63/17632	1.7091e-07	5.62252e-06	3.89006e-06	ZC3H12A/POP7/RNASE2/POP1/RNASEH2A/RPP40/EXO1	7
MF	GO:0008536	Ran GTPase binding	6/115	39/17632	1.84778e-07	5.62252e-06	3.89006e-06	XPO5/IPO4/XPOT/NXT1/NUTF2/XPO1	6
MF	GO:0016779	nucleotidyltransferase activity	9/115	135/17632	2.44916e-07	6.52089e-06	4.51161e-06	CD3EAP/OAS1/OAS2/OAS3/PNPT1/DKC1/PTGES3/PRIM1/TERT	9
MF	GO:0140101	catalytic activity, acting on a tRNA	8/115	120/17632	1.17282e-06	2.77568e-05	1.92041e-05	METTL1/PUS1/DUS4L/POP7/NSUN2/POP1/RPP40/PTRH2	8
MF	GO:0004519	endonuclease activity	8/115	124/17632	1.50379e-06	3.10721e-05	2.14979e-05	ZC3H12A/POP7/RNASE2/RNASE3/POP1/RNASEH2A/RPP40/EXO1	8
MF	GO:0030515	snoRNA binding	5/115	31/17632	1.60466e-06	3.10721e-05	2.14979e-05	BYSL/RRP9/DKC1/HEATR1/NOP56	5
MF	GO:0016891	endoribonuclease activity, producing 5'-phosphomonoesters	5/115	34/17632	2.58722e-06	4.59231e-05	3.17728e-05	POP7/POP1/RNASEH2A/RPP40/EXO1	5
MF	GO:0140142	nucleocytoplasmic carrier activity	4/115	19/17632	6.17111e-06	0.000101111	6.99559e-05	XPO5/RAN/NUTF2/XPO1	4
MF	GO:0070034	telomerase RNA binding	4/115	22/17632	1.14718e-05	0.000170044	0.000117648	DKC1/SNRPB/TERT/WRAP53	4
MF	GO:0016893	endonuclease activity, active with either ribo- or deoxyribonucleic acids and producing 5'-phosphomonoesters	5/115	46/17632	1.19749e-05	0.000170044	0.000117648	POP7/POP1/RNASEH2A/RPP40/EXO1	5
MF	GO:0003964	RNA-directed DNA polymerase activity	3/115	12/17632	5.69672e-05	0.000703765	0.000486914	DKC1/PTGES3/TERT	3
MF	GO:0004526	ribonuclease P activity	3/115	12/17632	5.69672e-05	0.000703765	0.000486914	POP7/POP1/RPP40	3
MF	GO:0004386	helicase activity	7/115	151/17632	5.94731e-05	0.000703765	0.000486914	EIF4A3/MOV10L1/RUVBL1/DDX39A/DHX34/HELZ2/TTF2	7
MF	GO:0009982	pseudouridine synthase activity	3/115	13/17632	7.37053e-05	0.000826276	0.000571676	PUS1/PUS7/DKC1	3
MF	GO:0008168	methyltransferase activity	8/115	216/17632	8.57416e-05	0.000873274	0.000604192	METTL1/HENMT1/NOP2/NSUN5/DNMT3B/EZH2/NSUN2/DNMT1	8
MF	GO:0004532	exoribonuclease activity	4/115	36/17632	8.60974e-05	0.000873274	0.000604192	ZC3H12A/PNPT1/EXOSC5/ERI1	4
MF	GO:0016741	transferase activity, transferring one-carbon groups	8/115	228/17632	0.000124745	0.0011514	0.000796616	METTL1/HENMT1/NOP2/NSUN5/DNMT3B/EZH2/NSUN2/DNMT1	8
MF	GO:0008026	ATP-dependent helicase activity	5/115	75/17632	0.000129735	0.0011514	0.000796616	EIF4A3/MOV10L1/RUVBL1/DHX34/HELZ2	5
MF	GO:0070035	purine NTP-dependent helicase activity	5/115	75/17632	0.000129735	0.0011514	0.000796616	EIF4A3/MOV10L1/RUVBL1/DHX34/HELZ2	5
MF	GO:0004004	ATP-dependent RNA helicase activity	4/115	42/17632	0.000158746	0.00129334	0.000894825	EIF4A3/MOV10L1/DHX34/HELZ2	4
MF	GO:0004527	exonuclease activity	5/115	79/17632	0.000165939	0.00129334	0.000894825	ZC3H12A/PNPT1/EXOSC5/ERI1/EXO1	5
MF	GO:0004549	tRNA-specific ribonuclease activity	3/115	17/17632	0.000171938	0.00129334	0.000894825	POP7/POP1/RPP40	3
MF	GO:0140104	molecular carrier activity	4/115	43/17632	0.000174151	0.00129334	0.000894825	XPO5/RAN/NUTF2/XPO1	4
MF	GO:0003730	mRNA 3'-UTR binding	5/115	80/17632	0.000176089	0.00129334	0.000894825	ZC3H12A/BOLL/IGF2BP1/IGF2BP3/PABPC1L	5
MF	GO:0008186	RNA-dependent ATPase activity	4/115	44/17632	0.000190608	0.00135331	0.000936318	EIF4A3/MOV10L1/DHX34/HELZ2	4
MF	GO:0140097	catalytic activity, acting on DNA	7/115	185/17632	0.000210986	0.00144968	0.00100299	RUVBL1/DNMT3B/DKC1/PTGES3/DNMT1/TERT/EXO1	7
MF	GO:0003724	RNA helicase activity	4/115	48/17632	0.000267784	0.00172842	0.00119584	EIF4A3/MOV10L1/DHX34/HELZ2	4
MF	GO:0017069	snRNA binding	4/115	48/17632	0.000267784	0.00172842	0.00119584	NCBP2/EIF5A/SNRPB/PRPF4	4
MF	GO:0003727	single-stranded RNA binding	5/115	90/17632	0.000305703	0.00191514	0.00132503	PUS1/EIF4A3/SNRPC/PNPT1/PABPC1L	5
MF	GO:0016796	exonuclease activity, active with either ribo- or deoxyribonucleic acids and producing 5'-phosphomonoesters	4/115	55/17632	0.00045319	0.00268138	0.00185516	PNPT1/EXOSC5/ERI1/EXO1	4
MF	GO:0043022	ribosome binding	4/115	55/17632	0.00045319	0.00268138	0.00185516	ZC3H12A/EIF6/EIF5A/ERI1	4
MF	GO:0008757	S-adenosylmethionine-dependent methyltransferase activity	6/115	155/17632	0.000535952	0.00308535	0.00213466	METTL1/NOP2/DNMT3B/EZH2/NSUN2/DNMT1	6
MF	GO:0045182	translation regulator activity	4/115	59/17632	0.00059278	0.00332269	0.00229887	BOLL/EIF4A3/IGF2BP1/IGF2BP3	4
MF	GO:0016866	intramolecular transferase activity	3/115	27/17632	0.000705264	0.00385183	0.00266497	PUS1/PUS7/DKC1	3
MF	GO:0008173	RNA methyltransferase activity	4/115	63/17632	0.00076046	0.00404945	0.00280169	METTL1/HENMT1/NOP2/NSUN2	4
MF	GO:0070566	adenylyltransferase activity	3/115	28/17632	0.000786157	0.00408418	0.00282573	OAS1/OAS2/OAS3	3
MF	GO:0003729	mRNA binding	10/115	463/17632	0.000902372	0.00457631	0.00316622	NCBP2/ZC3H12A/XPO5/BOLL/EIF4A3/IGF2BP1/IGF2BP3/SNRPC/MRPL13/PABPC1L	10
MF	GO:0070717	poly-purine tract binding	3/115	30/17632	0.0009651	0.00478061	0.00330757	EIF4A3/PNPT1/PABPC1L	3
MF	GO:0000175	3'-5'-exoribonuclease activity	3/115	32/17632	0.00116792	0.00565377	0.00391168	PNPT1/EXOSC5/ERI1	3
MF	GO:0016896	exoribonuclease activity, producing 5'-phosphomonoesters	3/115	34/17632	0.00139575	0.00660654	0.00457087	PNPT1/EXOSC5/ERI1	3
MF	GO:0003725	double-stranded RNA binding	4/115	75/17632	0.00146146	0.00676718	0.00468201	OAS1/OAS2/OAS3/ILF2	4
MF	GO:0034061	DNA polymerase activity	3/115	36/17632	0.00164969	0.00747624	0.00517259	DKC1/PTGES3/TERT	3
MF	GO:0003735	structural constituent of ribosome	6/115	200/17632	0.0019972	0.00886257	0.00613175	MRPL36/MRPL47/MRPL13/MRPL14/RPL39L/RPL22L1	6
MF	GO:0004523	RNA-DNA hybrid ribonuclease activity	2/115	11/17632	0.00223194	0.00970211	0.0067126	RNASEH2A/EXO1	2
MF	GO:0008565	protein transporter activity	4/115	88/17632	0.00262802	0.0111384	0.00770631	XPO5/NXT1/NUTF2/XPO1	4
MF	GO:0004126	cytidine deaminase activity	2/115	12/17632	0.00266693	0.0111384	0.00770631	APOBEC3F/APOBEC3G	2
MF	GO:0016853	isomerase activity	5/115	147/17632	0.00276996	0.0113462	0.00785009	PUS1/PUS7/DKC1/PTGES3/PPIH	5
MF	GO:0017070	U6 snRNA binding	2/115	13/17632	0.00313843	0.0121683	0.00841887	EIF5A/PRPF4	2
MF	GO:0034062	5'-3' RNA polymerase activity	3/115	45/17632	0.00314204	0.0121683	0.00841887	CD3EAP/PRIM1/TERT	3
MF	GO:0097747	RNA polymerase activity	3/115	45/17632	0.00314204	0.0121683	0.00841887	CD3EAP/PRIM1/TERT	3
MF	GO:0008408	3'-5' exonuclease activity	3/115	54/17632	0.00526412	0.0200225	0.013853	PNPT1/EXOSC5/ERI1	3
MF	GO:0035613	RNA stem-loop binding	2/115	17/17632	0.00537978	0.0201034	0.0139089	ZC3H12A/EIF4A3	2
MF	GO:0008143	poly(A) binding	2/115	24/17632	0.0105982	0.0382614	0.026472	EIF4A3/PABPC1L	2
MF	GO:0048027	mRNA 5'-UTR binding	2/115	24/17632	0.0105982	0.0382614	0.026472	IGF2BP1/IGF2BP3	2

## Sheet: GO-down
ONTOLOGY	ID	Description	GeneRatio	BgRatio	pvalue	p.adjust	qvalue	geneID	Count
BP	GO:0006417	regulation of translation	25/94	402/18493	1.33218e-20	1.21077e-17	1.09322e-17	DAZ1/DAZ2/EIF1B/POLDIP3/TNRC6C/CIRBP/ACO1/PAIP2B/ANG/PURA/AGO4/EIF2AK3/CTIF/SEPSECS/CELF4/CPEB1/CPEB2/CPEB3/CPEB4/SECISBP2L/SECISBP2/EEF2/EIF4B/CNOT6L/EIF4E3	25
BP	GO:0034248	regulation of cellular amide metabolic process	26/94	453/18493	1.50406e-20	1.21077e-17	1.09322e-17	DAZ1/DAZ2/EIF1B/POLDIP3/TNRC6C/CIRBP/ACO1/PAIP2B/ANG/PURA/AGO4/EIF2AK3/CTIF/EEF1A2/SEPSECS/CELF4/CPEB1/CPEB2/CPEB3/CPEB4/SECISBP2L/SECISBP2/EEF2/EIF4B/CNOT6L/EIF4E3	26
BP	GO:0008380	RNA splicing	22/94	463/18493	1.07158e-15	5.75082e-13	5.19247e-13	SRSF8/NCBP2L/RBM5/CLK4/CLK1/CIRBP/RBM20/KHDRBS2/PPARGC1A/ZC3H13/RBPMS/RBPMS2/SNRPN/ERN1/CELF2/CELF4/DDX17/NSRP1/ESRP2/NOVA1/SRRM4/SUPT6H	22
BP	GO:0043484	regulation of RNA splicing	14/94	135/18493	6.51249e-15	2.62128e-12	2.36678e-12	SRSF8/RBM5/CLK4/CLK1/CIRBP/RBM20/KHDRBS2/ERN1/CELF2/CELF4/DDX17/NSRP1/ESRP2/SRRM4	14
BP	GO:0006414	translational elongation	13/94	134/18493	1.53548e-13	4.94425e-11	4.46421e-11	MRPL34/MRPL54/MRPL35/EEF2K/EEF1A2/SEPSECS/CPEB2/CPEB3/SECISBP2L/SECISBP2/EEF2/MRPS36/MRPS25	13
BP	GO:1903311	regulation of mRNA metabolic process	16/94	264/18493	3.20616e-13	8.6032e-11	7.76791e-11	SRSF8/TNRC6C/RBM5/MYEF2/CIRBP/KHDRBS2/CELF2/CELF4/DDX17/CPEB1/CPEB3/SECISBP2/NSRP1/CNOT6L/SRRM4/SUPT6H	16
BP	GO:0050684	regulation of mRNA processing	12/94	137/18493	4.77134e-12	1.09741e-09	9.9086e-10	SRSF8/RBM5/CIRBP/KHDRBS2/CELF2/CELF4/DDX17/CPEB1/CPEB3/NSRP1/SRRM4/SUPT6H	12
BP	GO:0017148	negative regulation of translation	13/94	196/18493	2.02926e-11	4.08389e-09	3.68738e-09	TNRC6C/CIRBP/PAIP2B/ANG/PURA/AGO4/EIF2AK3/CELF4/CPEB1/CPEB2/CPEB3/CPEB4/CNOT6L	13
BP	GO:0034249	negative regulation of cellular amide metabolic process	13/94	213/18493	5.76838e-11	1.0319e-08	9.31712e-09	TNRC6C/CIRBP/PAIP2B/ANG/PURA/AGO4/EIF2AK3/CELF4/CPEB1/CPEB2/CPEB3/CPEB4/CNOT6L	13
BP	GO:0000377	RNA splicing, via transesterification reactions with bulged adenosine as nucleophile	15/94	374/18493	6.38416e-10	9.34409e-08	8.43687e-08	SRSF8/NCBP2L/RBM5/CIRBP/KHDRBS2/RBPMS/RBPMS2/SNRPN/CELF2/CELF4/DDX17/NSRP1/ESRP2/NOVA1/SRRM4	15
BP	GO:0000398	mRNA splicing, via spliceosome	15/94	374/18493	6.38416e-10	9.34409e-08	8.43687e-08	SRSF8/NCBP2L/RBM5/CIRBP/KHDRBS2/RBPMS/RBPMS2/SNRPN/CELF2/CELF4/DDX17/NSRP1/ESRP2/NOVA1/SRRM4	15
BP	GO:0000375	RNA splicing, via transesterification reactions	15/94	377/18493	7.12606e-10	9.56079e-08	8.63253e-08	SRSF8/NCBP2L/RBM5/CIRBP/KHDRBS2/RBPMS/RBPMS2/SNRPN/CELF2/CELF4/DDX17/NSRP1/ESRP2/NOVA1/SRRM4	15
BP	GO:0048024	regulation of mRNA splicing, via spliceosome	9/94	99/18493	1.82183e-09	2.25627e-07	2.03721e-07	SRSF8/RBM5/CIRBP/KHDRBS2/CELF2/CELF4/DDX17/NSRP1/SRRM4	9
BP	GO:0006413	translational initiation	11/94	194/18493	4.12379e-09	4.508e-07	4.07032e-07	DAZ1/DAZ2/EIF1B/MTIF3/PAIP2B/EIF2AK3/CTIF/RPL3/EIF4B/EIF3L/EIF4E3	11
BP	GO:0000380	alternative mRNA splicing, via spliceosome	8/94	75/18493	4.2e-09	4.508e-07	4.07032e-07	SRSF8/RBM5/CELF2/CELF4/DDX17/NSRP1/ESRP2/SRRM4	8
BP	GO:0000381	regulation of alternative mRNA splicing, via spliceosome	7/94	65/18493	3.82682e-08	3.85074e-06	3.47687e-06	SRSF8/RBM5/CELF2/CELF4/DDX17/NSRP1/SRRM4	7
BP	GO:0006446	regulation of translational initiation	7/94	77/18493	1.25809e-07	1.19149e-05	1.0758e-05	DAZ1/DAZ2/EIF1B/PAIP2B/EIF2AK3/CTIF/EIF4B	7
BP	GO:0006401	RNA catabolic process	12/94	340/18493	1.52063e-07	1.36012e-05	1.22806e-05	TNRC6C/MYEF2/CIRBP/SIDT2/NUDT16/AGO4/CTIF/RPL3/ERN1/CPEB3/SECISBP2/CNOT6L	12
BP	GO:2000765	regulation of cytoplasmic translation	5/94	28/18493	2.73039e-07	2.31365e-05	2.08901e-05	CPEB1/CPEB2/CPEB3/CPEB4/EEF2	5
BP	GO:0006402	mRNA catabolic process	11/94	307/18493	4.48084e-07	3.55733e-05	3.21195e-05	TNRC6C/MYEF2/CIRBP/NUDT16/AGO4/CTIF/RPL3/ERN1/CPEB3/SECISBP2/CNOT6L	11
BP	GO:0002181	cytoplasmic translation	7/94	93/18493	4.64e-07	3.55733e-05	3.21195e-05	CPEB1/CPEB2/CPEB3/CPEB4/EEF2/EIF4B/EIF3L	7
BP	GO:0022613	ribonucleoprotein complex biogenesis	13/94	485/18493	1.02886e-06	7.4231e-05	6.70239e-05	RBM5/CIRBP/NUDT16/AGO4/RPL3/CELF2/CELF4/DDX17/EIF4B/EIF3L/NSA2/THUMPD1/CNOT6L	13
BP	GO:0090501	RNA phosphodiester bond hydrolysis	8/94	152/18493	1.06044e-06	7.4231e-05	6.70239e-05	REXO2/AZGP1/RNASE4/ANG/NUDT16/ERN1/ELAC1/CNOT6L	8
BP	GO:0071826	ribonucleoprotein complex subunit organization	10/94	289/18493	2.11487e-06	0.000141873	0.000128098	RBM5/CIRBP/MTIF3/AGO4/RPL3/CELF2/CELF4/EIF4B/EIF3L/CNOT6L	10
BP	GO:1903313	positive regulation of mRNA metabolic process	6/94	75/18493	2.22846e-06	0.000143513	0.000129579	TNRC6C/CIRBP/CELF4/CPEB1/CPEB3/CNOT6L	6
BP	GO:0045727	positive regulation of translation	7/94	120/18493	2.60699e-06	0.000161433	0.000145759	DAZ1/DAZ2/POLDIP3/CIRBP/CTIF/CPEB3/EEF2	7
BP	GO:0034250	positive regulation of cellular amide metabolic process	7/94	140/18493	7.24861e-06	0.000432232	0.000390266	DAZ1/DAZ2/POLDIP3/CIRBP/CTIF/CPEB3/EEF2	7
BP	GO:0022618	ribonucleoprotein complex assembly	9/94	275/18493	1.10095e-05	0.000633044	0.000571582	RBM5/CIRBP/AGO4/RPL3/CELF2/CELF4/EIF4B/EIF3L/CNOT6L	9
BP	GO:0140053	mitochondrial gene expression	7/94	159/18493	1.66423e-05	0.000923935	0.000834229	MRPL34/MRPL54/MRPL35/MTIF3/PPARGC1B/MRPS36/MRPS25	7
BP	GO:0090305	nucleic acid phosphodiester bond hydrolysis	9/94	295/18493	1.92335e-05	0.0010322	0.000931979	REXO2/ZC3H12B/AZGP1/RNASE4/ANG/NUDT16/ERN1/ELAC1/CNOT6L	9
BP	GO:0050685	positive regulation of mRNA processing	4/94	32/18493	2.01837e-05	0.00104825	0.000946475	CIRBP/CELF4/CPEB1/CPEB3	4
BP	GO:0033120	positive regulation of RNA splicing	4/94	36/18493	3.25521e-05	0.00163778	0.00147877	CIRBP/RBM20/ERN1/CELF4	4
BP	GO:0002931	response to ischemia	4/94	41/18493	5.48871e-05	0.00267782	0.00241783	EEF2K/PPARGC1A/CPEB4/EEF2	4
BP	GO:0032543	mitochondrial translation	6/94	135/18493	6.5116e-05	0.00308344	0.00278406	MRPL34/MRPL54/MRPL35/MTIF3/MRPS36/MRPS25	6
BP	GO:0061013	regulation of mRNA catabolic process	6/94	140/18493	7.96888e-05	0.00366568	0.00330978	TNRC6C/MYEF2/CIRBP/CPEB3/SECISBP2/CNOT6L	6
BP	GO:0070125	mitochondrial translational elongation	5/94	88/18493	8.55916e-05	0.00382785	0.0034562	MRPL34/MRPL54/MRPL35/MRPS36/MRPS25	5
BP	GO:0070126	mitochondrial translational termination	5/94	89/18493	9.03247e-05	0.00393035	0.00354875	MRPL34/MRPL54/MRPL35/MRPS36/MRPS25	5
BP	GO:0016553	base conversion or substitution editing	3/94	20/18493	0.000136174	0.00576948	0.00520932	APOBEC2/RBM47/NUDT16	3
BP	GO:0009451	RNA modification	6/94	157/18493	0.000149692	0.00617959	0.00557961	TRMT10B/APOBEC2/RBM47/NUDT16/ZC3H13/THUMPD1	6
BP	GO:0006415	translational termination	5/94	101/18493	0.000164302	0.00661315	0.00597107	MRPL34/MRPL54/MRPL35/MRPS36/MRPS25	5
BP	GO:0051151	negative regulation of smooth muscle cell differentiation	3/94	23/18493	0.000209222	0.0082158	0.00741812	RBPMS2/MECP2/PDCD4	3
BP	GO:0036293	response to decreased oxygen levels	8/94	325/18493	0.000250457	0.00960085	0.0086687	SMAD4/ANG/EEF2K/PPARGC1A/CPEB1/CPEB2/CPEB4/MECP2	8
BP	GO:0051148	negative regulation of muscle cell differentiation	4/94	62/18493	0.00027869	0.0104347	0.00942157	SMAD4/RBPMS2/MECP2/PDCD4	4
BP	GO:0031060	regulation of histone methylation	4/94	63/18493	0.000296434	0.0108468	0.00979367	SMAD4/MECP2/SETD7/SUPT6H	4
BP	GO:0006399	tRNA metabolic process	6/94	184/18493	0.000352651	0.0126171	0.0113921	TRMT10B/QARS/SEPSECS/ELAC1/TARSL2/THUMPD1	6
BP	GO:0070482	response to oxygen levels	8/94	349/18493	0.000403503	0.0141226	0.0127514	SMAD4/ANG/EEF2K/PPARGC1A/CPEB1/CPEB2/CPEB4/MECP2	8
BP	GO:0090502	RNA phosphodiester bond hydrolysis, endonucleolytic	4/94	76/18493	0.000607145	0.0207979	0.0187786	RNASE4/NUDT16/ERN1/ELAC1	4
BP	GO:0000956	nuclear-transcribed mRNA catabolic process	6/94	207/18493	0.000657339	0.0220482	0.0199076	TNRC6C/CTIF/RPL3/CPEB3/SECISBP2/CNOT6L	6
BP	GO:0000289	nuclear-transcribed mRNA poly(A) tail shortening	3/94	34/18493	0.0006789	0.0223067	0.020141	TNRC6C/CPEB3/CNOT6L	3
BP	GO:0031056	regulation of histone modification	5/94	139/18493	0.000716825	0.0230818	0.0208407	SMAD4/PPARGC1A/MECP2/SETD7/SUPT6H	5
BP	GO:0043414	macromolecule methylation	7/94	300/18493	0.000846307	0.0267168	0.0241228	TDRD9/TRMT10B/SMAD4/ZC3H13/MECP2/SETD7/SUPT6H	7
BP	GO:0030509	BMP signaling pathway	5/94	152/18493	0.00107112	0.0331635	0.0299436	SMAD9/SMAD4/SMAD7/RBPMS2/PDCD4	5
BP	GO:0061647	histone H3-K9 modification	3/94	42/18493	0.00126474	0.0384194	0.0346892	SMAD4/MECP2/SETD7	3
BP	GO:0002182	cytoplasmic translational elongation	2/94	11/18493	0.00136463	0.0392332	0.035424	CPEB2/CPEB3	2
BP	GO:0031442	positive regulation of mRNA 3'-end processing	2/94	11/18493	0.00136463	0.0392332	0.035424	CPEB1/CPEB3	2
BP	GO:1900247	regulation of cytoplasmic translational elongation	2/94	11/18493	0.00136463	0.0392332	0.035424	CPEB2/CPEB3	2
BP	GO:0061014	positive regulation of mRNA catabolic process	3/94	44/18493	0.00144841	0.0409113	0.0369392	TNRC6C/CPEB3/CNOT6L	3
BP	GO:0071772	response to BMP	5/94	165/18493	0.00154138	0.0417104	0.0376607	SMAD9/SMAD4/SMAD7/RBPMS2/PDCD4	5
BP	GO:0071773	cellular response to BMP stimulus	5/94	165/18493	0.00154138	0.0417104	0.0376607	SMAD9/SMAD4/SMAD7/RBPMS2/PDCD4	5
BP	GO:0016554	cytidine to uridine editing	2/94	12/18493	0.00163215	0.0417104	0.0376607	APOBEC2/RBM47	2
BP	GO:0060211	regulation of nuclear-transcribed mRNA poly(A) tail shortening	2/94	12/18493	0.00163215	0.0417104	0.0376607	TNRC6C/CPEB3	2
BP	GO:0060213	positive regulation of nuclear-transcribed mRNA poly(A) tail shortening	2/94	12/18493	0.00163215	0.0417104	0.0376607	TNRC6C/CPEB3	2
BP	GO:0060391	positive regulation of SMAD protein signal transduction	2/94	12/18493	0.00163215	0.0417104	0.0376607	SMAD4/RBPMS	2
BP	GO:0048660	regulation of smooth muscle cell proliferation	5/94	168/18493	0.00166857	0.041975	0.0378997	ANG/PPARGC1A/RBPMS2/ERN1/PDCD4	5
BP	GO:0036294	cellular response to decreased oxygen levels	5/94	170/18493	0.00175755	0.0428735	0.0387109	EEF2K/PPARGC1A/CPEB1/CPEB2/CPEB4	5
BP	GO:0048659	smooth muscle cell proliferation	5/94	170/18493	0.00175755	0.0428735	0.0387109	ANG/PPARGC1A/RBPMS2/ERN1/PDCD4	5
BP	GO:0009409	response to cold	3/94	48/18493	0.00186403	0.0447923	0.0404433	CIRBP/EIF2AK3/PPARGC1A	3
BP	GO:1902275	regulation of chromatin organization	5/94	175/18493	0.00199518	0.0472388	0.0426523	SMAD4/PPARGC1A/MECP2/SETD7/SUPT6H	5
BP	GO:0022412	cellular process involved in reproduction in multicellular organism	7/94	350/18493	0.00204998	0.0478329	0.0431888	TDRD9/DAZ1/DAZ2/AFF4/ANG/AGO4/CELF4	7
CC	GO:0005840	ribosome	9/97	276/19659	9.04267e-06	0.00132023	0.00111368	MRPL34/MRPL54/MRPL35/EIF2AK3/PPARGC1A/RPL3/EEF2/MRPS36/MRPS25	9
CC	GO:0036464	cytoplasmic ribonucleoprotein granule	7/97	207/19659	7.47472e-05	0.00517355	0.00436413	TDRD9/POLDIP3/TNRC6C/CIRBP/AGO4/RBPMS/CPEB1	7
CC	GO:0035770	ribonucleoprotein granule	7/97	219/19659	0.000106306	0.00517355	0.00436413	TDRD9/POLDIP3/TNRC6C/CIRBP/AGO4/RBPMS/CPEB1	7
CC	GO:0008023	transcription elongation factor complex	4/97	57/19659	0.000180039	0.00657141	0.00554329	AFF1/AFF3/AFF4/SUPT6H	4
CC	GO:0000932	P-body	4/97	84/19659	0.000794491	0.0189021	0.0159449	TNRC6C/AGO4/RBPMS/CPEB1	4
CC	GO:0000313	organellar ribosome	4/97	87/19659	0.000906267	0.0189021	0.0159449	MRPL34/MRPL54/MRPL35/MRPS36	4
CC	GO:0005761	mitochondrial ribosome	4/97	87/19659	0.000906267	0.0189021	0.0159449	MRPL34/MRPL54/MRPL35/MRPS36	4
CC	GO:0034518	RNA cap binding complex	2/97	15/19659	0.00242634	0.030393	0.025638	NCBP2L/EIF4E3	2
CC	GO:0044391	ribosomal subunit	5/97	191/19659	0.00257242	0.030393	0.025638	MRPL34/MRPL54/MRPL35/RPL3/MRPS36	5
CC	GO:0030014	CCR4-NOT complex	2/97	16/19659	0.00276407	0.030393	0.025638	CPEB3/CNOT6L	2
CC	GO:0097440	apical dendrite	2/97	16/19659	0.00276407	0.030393	0.025638	PPARGC1A/CPEB3	2
CC	GO:0000315	organellar large ribosomal subunit	3/97	57/19659	0.00280939	0.030393	0.025638	MRPL34/MRPL54/MRPL35	3
CC	GO:0005762	mitochondrial large ribosomal subunit	3/97	57/19659	0.00280939	0.030393	0.025638	MRPL34/MRPL54/MRPL35	3
CC	GO:0015934	large ribosomal subunit	4/97	121/19659	0.00304529	0.030393	0.025638	MRPL34/MRPL54/MRPL35/RPL3	4
CC	GO:0016282	eukaryotic 43S preinitiation complex	2/97	17/19659	0.00312257	0.030393	0.025638	EIF1B/EIF3L	2
CC	GO:0070993	translation preinitiation complex	2/97	18/19659	0.00350164	0.0319524	0.0269534	EIF1B/EIF3L	2
CC	GO:0035145	exon-exon junction complex	2/97	20/19659	0.00432063	0.0371066	0.0313012	TDRD3/R3HCC1	2
MF	GO:0090079	translation regulator activity, nucleic acid binding	10/99	27/17632	1.52256e-16	3.10602e-14	2.32391e-14	DAZ1/DAZ2/PAIP2B/PURA/CTIF/CELF4/CPEB1/CPEB2/CPEB3/CPEB4	10
MF	GO:0045182	translation regulator activity	12/99	59/17632	4.44539e-16	4.5343e-14	3.39254e-14	DAZ1/DAZ2/CIRBP/PAIP2B/PURA/EIF2AK3/CTIF/CELF4/CPEB1/CPEB2/CPEB3/CPEB4	12
MF	GO:0003729	mRNA binding	22/99	463/17632	9.03859e-15	6.14624e-13	4.59858e-13	DAZ1/DAZ2/RBM5/MYEF2/CIRBP/ACO1/AUH/NUDT16/RBPMS2/CELF2/CELF4/CPEB1/CPEB2/CPEB3/CPEB4/SECISBP2L/SECISBP2/MECP2/NSRP1/ESRP2/NOVA1/SRRM4	22
MF	GO:0008135	translation factor activity, RNA binding	12/99	89/17632	8.21717e-14	4.19076e-12	3.1355e-12	EIF1B/MTIF3/EEF2K/EEF1A2/CPEB1/CPEB2/CPEB3/CPEB4/EEF2/EIF4B/EIF3L/EIF4E3	12
MF	GO:0000900	translation repressor activity, mRNA regulatory element binding	7/99	14/17632	4.71277e-13	1.92281e-11	1.43864e-11	PAIP2B/PURA/CELF4/CPEB1/CPEB2/CPEB3/CPEB4	7
MF	GO:0030371	translation repressor activity	8/99	26/17632	1.06439e-12	3.61893e-11	2.70766e-11	CIRBP/PAIP2B/PURA/CELF4/CPEB1/CPEB2/CPEB3/CPEB4	8
MF	GO:0003730	mRNA 3'-UTR binding	10/99	80/17632	2.32808e-11	6.7847e-10	5.07628e-10	DAZ1/DAZ2/CIRBP/AUH/CPEB1/CPEB2/CPEB3/CPEB4/SECISBP2L/SECISBP2	10
MF	GO:0140098	catalytic activity, acting on RNA	15/99	352/17632	1.11793e-09	2.85072e-08	2.13289e-08	REXO2/TDRD9/TRMT10B/QARS/AZGP1/RNASE4/ANG/NUDT16/SEPSECS/ERN1/DHX32/DDX17/ELAC1/TARSL2/CNOT6L	15
MF	GO:0043021	ribonucleoprotein complex binding	10/99	128/17632	2.57116e-09	5.82797e-08	4.36045e-08	EIF1B/MTIF3/CPEB1/CPEB2/CPEB3/CPEB4/SECISBP2L/SECISBP2/EEF2/EIF4B	10
MF	GO:0004540	ribonuclease activity	8/99	112/17632	2.18151e-07	4.45029e-06	3.32968e-06	REXO2/AZGP1/RNASE4/ANG/NUDT16/ERN1/ELAC1/CNOT6L	8
MF	GO:0043022	ribosome binding	6/99	55/17632	6.24033e-07	1.1573e-05	8.65883e-06	MTIF3/CPEB1/CPEB2/CPEB3/CPEB4/EEF2	6
MF	GO:0043024	ribosomal small subunit binding	4/99	16/17632	1.61591e-06	2.74704e-05	2.05532e-05	EIF1B/MTIF3/CPEB2/EIF4B	4
MF	GO:0004518	nuclease activity	9/99	202/17632	2.02258e-06	3.1739e-05	2.37469e-05	REXO2/ZC3H12B/AZGP1/RNASE4/ANG/NUDT16/ERN1/ELAC1/CNOT6L	9
MF	GO:0003743	translation initiation factor activity	5/99	51/17632	9.6482e-06	0.000140588	0.000105187	EIF1B/MTIF3/EIF4B/EIF3L/EIF4E3	5
MF	GO:0005072	transforming growth factor beta receptor, cytoplasmic mediator activity	3/99	10/17632	2.0024e-05	0.000272326	0.000203753	SMAD9/SMAD4/SMAD7	3
MF	GO:0008494	translation activator activity	3/99	13/17632	4.71425e-05	0.000601067	0.000449715	DAZ1/DAZ2/CTIF	3
MF	GO:0035925	mRNA 3'-UTR AU-rich region binding	3/99	14/17632	5.97551e-05	0.000717061	0.000536501	CPEB1/CPEB2/CPEB3	3
MF	GO:0004519	endonuclease activity	6/99	124/17632	7.03979e-05	0.000797843	0.000596942	ZC3H12B/RNASE4/ANG/NUDT16/ERN1/ELAC1	6
MF	GO:0035613	RNA stem-loop binding	3/99	17/17632	0.000110272	0.00118397	0.000885841	RBPMS/RBPMS2/CPEB3	3
MF	GO:0003727	single-stranded RNA binding	5/99	90/17632	0.000151872	0.0015491	0.00115902	CIRBP/AGO4/KHDRBS2/RBPMS/EIF4B	5
MF	GO:0004521	endoribonuclease activity	4/99	63/17632	0.000432095	0.0041975	0.00314054	RNASE4/NUDT16/ERN1/ELAC1	4
MF	GO:0017091	AU-rich element binding	3/99	28/17632	0.000507966	0.00471023	0.00352417	CPEB1/CPEB2/CPEB3	3
MF	GO:0070411	I-SMAD binding	2/99	11/17632	0.00166076	0.0147302	0.011021	SMAD4/SMAD7	2
MF	GO:0008186	RNA-dependent ATPase activity	3/99	44/17632	0.00192437	0.0163571	0.0122383	TDRD9/DHX32/DDX17	3
MF	GO:0003724	RNA helicase activity	3/99	48/17632	0.00247273	0.0194014	0.014516	TDRD9/DHX32/DDX17	3
MF	GO:0017069	snRNA binding	3/99	48/17632	0.00247273	0.0194014	0.014516	HEXIM2/RBPMS/RBPMS2	3
MF	GO:0034459	ATP-dependent 3'-5' RNA helicase activity	2/99	18/17632	0.00450319	0.0340241	0.0254566	TDRD9/DHX32	2
MF	GO:0140101	catalytic activity, acting on a tRNA	4/99	120/17632	0.00467235	0.0340414	0.0254696	TRMT10B/QARS/SEPSECS/TARSL2	4
MF	GO:0034458	3'-5' RNA helicase activity	2/99	19/17632	0.00501464	0.0352754	0.0263928	TDRD9/DHX32	2
MF	GO:0003735	structural constituent of ribosome	5/99	200/17632	0.00540152	0.0365326	0.0273335	MRPL34/MRPL35/RPL3/MRPS36/MRPS25	5
MF	GO:0003746	translation elongation factor activity	2/99	20/17632	0.00555153	0.0365326	0.0273335	EEF1A2/EEF2	2
MF	GO:0019843	rRNA binding	3/99	65/17632	0.00583011	0.037167	0.0278081	CIRBP/ANG/EEF2	3
MF	GO:0022884	macromolecule transmembrane transporter activity	2/99	23/17632	0.0073119	0.0452008	0.033819	AZGP1/SIDT2	2
MF	GO:0008143	poly(A) binding	2/99	24/17632	0.00794762	0.0476857	0.0356782	KHDRBS2/RBPMS	2

## Sheet: KEGG-up
ID	Description	GeneRatio	BgRatio	pvalue	p.adjust	qvalue	geneID	Count
hsa03013	RNA transport	19/67	180/8040	1.6331e-16	7.8389e-15	6.53242e-15	NCBP2/XPO5/ALYREF/EIF4A3/POP7/XPOT/NXT1/RAN/THOC3/RAE1/SMN1/XPO1/PABPC1L/GEMIN2/POP1/THOC6/RPP40/MAGOH/MAGOHB	19
hsa03040	Spliceosome	17/67	149/8040	2.17486e-15	5.21967e-14	4.34972e-14	NCBP2/SNRPD2/ALYREF/EIF4A3/SNRPD1/SNRPC/SNRPG/SNRPF/ISY1/THOC3/PPIH/SNRPB/EFTUD2/PRPF4/MAGOH/MAGOHB/SF3B4	17
hsa03008	Ribosome biogenesis in eukaryotes	13/67	112/8040	4.95638e-12	7.93021e-11	6.60851e-11	TCOF1/LSG1/EIF6/POP7/DKC1/NXT1/RAN/HEATR1/NOP56/UTP18/XPO1/POP1/RPP40	13
hsa03015	mRNA surveillance pathway	7/67	91/8040	9.44187e-06	0.000113302	9.44187e-05	NCBP2/ALYREF/EIF4A3/NXT1/PABPC1L/MAGOH/MAGOHB	7
hsa05164	Influenza A	6/67	170/8040	0.00281082	0.0269839	0.0224866	OAS1/OAS2/OAS3/NXT1/RAE1/XPO1	6

## Sheet: KEGG-down
ID	Description	GeneRatio	BgRatio	pvalue	p.adjust	qvalue	geneID	Count
hsa04914	Progesterone-mediated oocyte maturation	4/35	99/8040	0.000845002	0.0444337	0.0399828	CPEB1/CPEB2/CPEB3/CPEB4	4
hsa05134	Legionellosis	3/35	57/8040	0.00188272	0.0444337	0.0399828	CLK4/CLK1/EEF1A2	3
hsa04114	Oocyte meiosis	4/35	128/8040	0.00219007	0.0444337	0.0399828	CPEB1/CPEB2/CPEB3/CPEB4	4
hsa00970	Aminoacyl-tRNA biosynthesis	3/35	66/8040	0.00286669	0.0444337	0.0399828	QARS/SEPSECS/TARSL2	3
