# Supplementary material for: RNA-Binding Proteins CLK1 and POP7 as Biomarkers for Diagnosis and Prognosis of Esophageal Squamous Cell Carcinoma
Source: Front Cell Dev Biol. 2021 Sep 9;9:715027. doi: 10.3389/fcell.2021.715027 (PMC8458940; doi:10.3389/fcell.2021.715027)
Supplement: Supplementary Table 3 — Clinicopathological parameters of all patients with ESCC. [file Table_3.XLSX]

## Sheet: Sheet1
Id	futime	fustat	age	gender	tumor_grade	pathologic_stage	stage_T	stage_M	stage_N
TCGA-2H-A9GF	784	1	67	MALE	G3	Stage III	T3	M0	N1
TCGA-2H-A9GG	610	1	66	MALE	G2	Stage III	T3	M0	N1
TCGA-2H-A9GH	951	1	44	MALE	G2	Stage IIB	T1	M0	N1
TCGA-2H-A9GI	435	1	68	MALE	G2	Stage III	T3	M0	N1
TCGA-2H-A9GJ	1781	1	57	MALE	G2	Stage I	T1	M0	N0
TCGA-2H-A9GK	232	1	43	MALE	G3	Stage III	T3	M0	N1
TCGA-2H-A9GL	180	1	74	MALE	G3	Stage III	T3	M0	N1
TCGA-2H-A9GM	424	1	53	MALE	G2	Stage IIB	T1	M0	N1
TCGA-2H-A9GN	272	1	70	MALE	G3	Stage III	T3	M0	N1
TCGA-2H-A9GO	494	1	58	MALE	G3	Stage IVA	T3	M1a	N1
TCGA-2H-A9GQ	128	1	80	MALE	G3	Stage III	T3	M0	N1
TCGA-2H-A9GR	987	1	80	MALE	G2	Stage IIA	T3	M0	N0
TCGA-IC-A6RE	234	0	59	MALE	G2	Stage IIB	T1	M0	N1
TCGA-IC-A6RF	477	0	69	FEMALE	GX	Stage IA	T1	M0	N0
TCGA-IG-A3I8	1012	0	51	FEMALE	G2	Stage IIA	T3	M0	N0
TCGA-IG-A3QL	1071	0	54	MALE	G2	Stage IIA	T2	M0	N0
TCGA-IG-A3Y9	26	1	72	MALE	G2	Stage IIIA	T4	M0	N0
TCGA-IG-A3YA	632	0	53	MALE	G2	Stage IIIA	T4	M0	N0
TCGA-IG-A3YB	80	0	61	MALE	G2	Stage IIIA	T3	M0	N1
TCGA-IG-A3YC	612	0	62	MALE	G2	Stage IIIA	T3	M0	N1
TCGA-IG-A4P3	567	1	48	MALE	G2	Stage IIB	T2	M0	N1
TCGA-IG-A4QS	118	1	71	MALE	G3	Stage IIIB	T3	M0	N2
TCGA-IG-A4QT	283	1	56	MALE	G2	Stage IIA	T3	M0	N0
TCGA-IG-A50L	16	0	58	MALE	G2	Stage IIIA	T3	M0	N1
TCGA-IG-A51D	518	0	63	MALE	G2	Stage IIB	T1	M0	N1
TCGA-IG-A5B8	24	1	72	MALE	G1	Stage IB	T3	M0	N0
TCGA-IG-A5S3	712	0	69	FEMALE	G2	Stage IIB	T3	M0	N0
TCGA-IG-A625	390	1	60	MALE	G2	Stage IIIB	T3	M0	N2
TCGA-IG-A6QS	303	1	54	MALE	G1	Stage IIB	T2	M0	N1
TCGA-IG-A7DP	452	0	50	FEMALE	G2	Stage IIIA	T4a	MX	NX
TCGA-IG-A8O2	142	1	62	MALE	G3	Stage IIIB	T3	M0	N2
TCGA-IG-A97H	441	0	36	MALE	G3	Stage IIA	T3	M0	NX
TCGA-IG-A97I	370	0	58	MALE	G2	Stage IIA	T2	M0	N0
TCGA-JY-A6F8	3714	0	56	MALE	G1	Stage I	T1	M0	N0
TCGA-JY-A6FA	1361	1	51	MALE	G2	Stage IIB	T2	M0	N1
TCGA-JY-A6FB	1837	0	77	MALE	G2	Stage I	T1	M0	N0
TCGA-JY-A6FD	2069	0	51	FEMALE	G1	Stage IIA	T3	M0	N0
TCGA-JY-A6FE	112	1	49	MALE	G3	Stage III	T3	M0	N1
TCGA-JY-A6FG	1263	1	50	MALE	G2	Stage III	T3	M0	N1
TCGA-JY-A6FH	1441	0	53	MALE	G2	Stage IIB	T2	M0	N1
TCGA-JY-A938	1060	0	75	MALE	G3	Stage IIB	T3	M0	N0
TCGA-JY-A939	660	0	77	MALE	G3	Stage IIB	T1	M0	N1
TCGA-JY-A93C	705	0	47	MALE	G3	Stage IIIB	T3	M0	N2
TCGA-JY-A93D	960	1	51	MALE	G3	Stage IIIC	T2	M0	N3
TCGA-JY-A93E	767	0	61	MALE	G3	Stage IIIA	T3	M0	N1
TCGA-JY-A93F	731	0	58	FEMALE	G1	Stage IB	T2	M0	N0
TCGA-KH-A6WC	191	0	82	MALE	GX	Stage IA	T1	M0	N0
TCGA-L5-A43C	96	0	81	MALE	GX	Stage IA	T1	M0	N0
TCGA-L5-A43E	920	0	74	MALE	GX	Stage I	T1	M0	N0
TCGA-L5-A43H	9	1	75	MALE	GX	Stage III	T3	M0	N1
TCGA-L5-A43I	556	1	77	MALE	GX	Stage IIIA	T3	MX	N1
TCGA-L5-A43J	0	1	90	MALE	G3	Stage IIB	T3	MX	N0
TCGA-L5-A43M	272	0	84	FEMALE	GX	Stage IIB	T3	MX	N2
TCGA-L5-A4OE	730	1	81	MALE	G2	Stage IIIB	T3	MX	N2
TCGA-L5-A4OF	801	1	63	MALE	G3	Stage IIB	T1	MX	N1
TCGA-L5-A4OG	143	0	79	FEMALE	G1	Stage I	T1	M0	N0
TCGA-L5-A4OH	992	0	71	MALE	GX	Stage I	T1	M0	N0
TCGA-L5-A4OI	608	0	79	MALE	G2	Stage IIIC	T3	MX	N3
TCGA-L5-A4OJ	639	0	70	FEMALE	G3	Stage I	T1	M0	N0
TCGA-L5-A4OM	1458	1	54	FEMALE	GX	Stage IA	T1	M0	N0
TCGA-L5-A4ON	558	1	65	MALE	GX	Stage IIB	T1	M0	N1
TCGA-L5-A4OO	101	0	75	MALE	G2	Stage IIIC	T3	M0	N3
TCGA-L5-A4OP	218	0	67	FEMALE	G2	Stage IA	T1	MX	N0
TCGA-L5-A4OQ	42	1	75	MALE	GX	Stage IIIA	T2	MX	N2
TCGA-L5-A4OR	96	1	83	MALE	GX	Stage IA	T1	MX	N0
TCGA-L5-A4OS	1271	0	86	FEMALE	G3	Stage IIB	T2	M0	N1
TCGA-L5-A4OT	149	1	77	MALE	GX	Stage IV	T3	M1a	N1
TCGA-L5-A4OU	882	0	81	MALE	GX	Stage IIA	T3	M0	N0
TCGA-L5-A4OW	217	1	56	FEMALE	GX	Stage IIB	T2	M0	N1
TCGA-L5-A4OX	226	1	60	MALE	GX	Stage IIB	T2	M0	N1
TCGA-L5-A88S	471	0	84	MALE	GX	Stage IB	T3	MX	N0
TCGA-L5-A88T	694	0	86	MALE	GX	Stage IIB	T2	M0	N1
TCGA-L5-A88V	79	0	60	MALE	GX	Stage III	T3	MX	N1
TCGA-L5-A88W	764	1	67	MALE	GX	Stage IIA	T3	MX	N0
TCGA-L5-A88Y	11	0	76	MALE	GX	Stage IIA	T1	MX	N0
TCGA-L5-A88Z	225	0	70	FEMALE	GX	Stage IIA	T1	M0	N1
TCGA-L5-A891	114	0	51	MALE	GX	Stage IIA	T3	M0	N1
TCGA-L5-A893	92	0	71	FEMALE	GX	Stage I	T1	M0	N0
TCGA-L5-A8NE	1688	0	77	MALE	GX	Stage IIB	T2	M0	N1
TCGA-L5-A8NF	81	1	57	MALE	GX	Stage IVA	T1	M1a	N0
TCGA-L5-A8NG	1094	0	77	MALE	GX	Stage III	T3	M0	N1
TCGA-L5-A8NH	393	1	54	MALE	GX	Stage IV	T1	M1	N0
TCGA-L5-A8NI	410	1	79	MALE	G3	Stage III	T3	M0	N1
TCGA-L5-A8NJ	501	0	77	MALE	GX	Stage III	T3	M0	N1
TCGA-L5-A8NK	412	0	84	FEMALE	G1	Stage IIA	T3	M0	N0
TCGA-L5-A8NL	402	0	56	MALE	GX	Stage III	T3	M0	N1
TCGA-L5-A8NM	236	1	84	FEMALE	GX	Stage IIB	T2	M0	N1
TCGA-L5-A8NN	167	0	81	MALE	GX	Stage III	T3	M0	N1
TCGA-L5-A8NQ	650	1	71	MALE	G3	Stage IIA	T2	M0	N0
TCGA-L5-A8NR	265	0	81	FEMALE	GX	Stage III	T3	M0	N1
TCGA-L5-A8NS	408	0	76	MALE	GX	Stage IIB	T3	M0	N0
TCGA-L5-A8NT	825	0	69	MALE	GX	Stage IIB	T3	M0	N0
TCGA-L5-A8NU	2134	1	84	MALE	G3	Stage IIA	T2	M0	N0
TCGA-L5-A8NV	1599	1	75	MALE	G3	Stage IIA	T3	M0	N0
TCGA-L5-A8NW	1402	1	55	MALE	GX	Stage IIA	T2	M0	N1
TCGA-L7-A56G	330	1	65	MALE	G3	Stage IIA	T2	M0	N1
TCGA-L7-A6VZ	315	0	62	MALE	G2	Stage IIIC	T3	MX	N3
TCGA-LN-A49K	180	1	66	MALE	G2	Stage IIA	T3	M0	N0
TCGA-LN-A49L	318	1	44	MALE	G2	Stage IIA	T2	M0	N0
TCGA-LN-A49M	385	0	62	MALE	G1	Stage IIA	T2	M0	N0
TCGA-LN-A49N	378	0	50	MALE	G2	Stage IIB	T2	M0	N1
TCGA-LN-A49O	408	0	47	MALE	G3	Stage IIA	T3	M0	N0
TCGA-LN-A49P	375	0	71	MALE	G2	Stage IIA	T3	M0	N0
TCGA-LN-A49R	407	0	46	MALE	G3	Stage III	T3	M0	N1
TCGA-LN-A49S	400	0	59	MALE	G2	Stage IIA	T3	M0	N0
TCGA-LN-A49U	467	0	62	MALE	G1	Stage IIA	T3	M0	N0
TCGA-LN-A49V	383	0	49	MALE	G3	Stage IIA	T3	M0	N0
TCGA-LN-A49W	403	0	73	MALE	G3	Stage III	T3	M0	N1
TCGA-LN-A49X	384	0	44	MALE	G2	Stage IIA	T3	M0	N0
TCGA-LN-A49Y	379	0	77	MALE	G2	Stage IIA	T3	M0	N0
TCGA-LN-A4A1	383	0	60	MALE	G3	Stage IIA	T3	M0	N0
TCGA-LN-A4A2	380	0	57	MALE	G1	Stage IIA	T3	M0	N0
TCGA-LN-A4A3	388	0	61	MALE	G2	Stage III	T3	M0	N1
TCGA-LN-A4A4	383	0	36	MALE	GX	Stage III	T3	M0	N1
TCGA-LN-A4A5	681	1	49	MALE	G2	Stage IIA	T2	M0	N0
TCGA-LN-A4A6	391	0	65	MALE	G2	Stage II	T2	M0	N0
TCGA-LN-A4A8	472	0	52	MALE	G2	Stage IIA	T2	M0	N0
TCGA-LN-A4A9	351	1	58	MALE	G1	Stage IIA	T2	M0	N0
TCGA-LN-A4MQ	375	0	46	MALE	G3	Stage III	T3	M0	N1
TCGA-LN-A4MR	402	0	57	MALE	G2	Stage IIA	T2	M0	N0
TCGA-LN-A5U5	136	1	57	MALE	G2	Stage IV	T3	M1	N1
TCGA-LN-A5U6	375	0	54	MALE	G2	Stage IIB	T2	M0	N1
TCGA-LN-A5U7	768	0	46	MALE	G1	Stage IIA	T2	M0	N0
TCGA-LN-A7HV	320	0	58	MALE	G1	Stage IIA	T2	M0	N0
TCGA-LN-A7HW	365	0	59	MALE	G2	Stage IIA	T2	M0	N0
TCGA-LN-A7HX	372	0	72	MALE	G2	Stage IIA	T2	M0	N0
TCGA-LN-A7HY	366	0	50	MALE	G2	Stage III	T3	M0	N1
TCGA-LN-A7HZ	401	0	49	MALE	G2	Stage IIA	T2	M0	N0
TCGA-LN-A8HZ	375	0	56	MALE	G3	Stage IIA	T2	M0	N0
TCGA-LN-A8I0	407	0	52	MALE	G2	Stage IIA	T2	M0	N0
TCGA-LN-A8I1	401	0	67	FEMALE	G3	Stage IIA	T2	M0	N0
TCGA-LN-A9FO	4	0	42	MALE	G2	Stage IIA	T2	M0	N0
TCGA-LN-A9FP	366	0	60	FEMALE	G3	Stage IIA	T2	M0	N0
TCGA-LN-A9FQ	391	0	62	MALE	G3	Stage IIA	T3	M0	N0
TCGA-LN-A9FR	373	0	70	MALE	G2	Stage IIB	T2	M0	N1
TCGA-M9-A5M8	1007	0	58	MALE	G2	Stage IIA	T3	M0	N0
TCGA-Q9-A6FU	157	1	57	FEMALE	G2	Stage IIIB	T3	M0	N2
TCGA-Q9-A6FW	238	0	61	MALE	G2	Stage IIIB	T3	M0	N2
TCGA-R6-A6DN	243	1	58	MALE	G3	Stage IIIB	T3	M0	N2
TCGA-R6-A6DQ	231	1	74	FEMALE	G3	Stage IIIB	T3	M0	N2
TCGA-R6-A6KZ	154	1	42	MALE	G3	Stage IIIB	T3	M0	N2
TCGA-R6-A6L4	496	1	27	MALE	G2	Stage IIIB	T3	M0	N2
TCGA-R6-A6L6	214	1	68	MALE	G3	Stage IIIB	T3	M0	N2
TCGA-R6-A6XG	1168	0	64	MALE	G2	Stage IIIB	T3	M0	N2
TCGA-R6-A6XQ	193	1	58	MALE	G3	Stage IIIB	T3	M0	N2
TCGA-R6-A6Y0	1641	0	54	MALE	G2	Stage IIIB	T3	M0	N2
TCGA-R6-A6Y2	283	1	71	MALE	G3	Stage IIIB	T3	M0	N2
TCGA-R6-A8W5	480	1	60	MALE	G2	Stage IVA	T3	M1a	N1
TCGA-R6-A8W8	88	1	72	MALE	G2	Stage IVA	T3	M1a	N1
TCGA-R6-A8WC	70	0	56	MALE	G2	Stage IVA	T3	M1a	N1
TCGA-R6-A8WG	386	1	60	MALE	G3	Stage IVA	T3	M1a	N1
TCGA-RE-A7BO	213	1	72	FEMALE	G3	Stage IIB	T1	M0	N1
TCGA-S8-A6BV	609	0	76	MALE	G2	Stage IIIA	T3	MX	N1
TCGA-S8-A6BW	620	0	51	MALE	G1	Stage IB	T2	MX	N0
TCGA-V5-A7RB	161	1	59	MALE	GX	Stage IB	T0	MX	N1
TCGA-V5-A7RC	104	1	55	MALE	GX	Stage IB	T0	MX	N1
TCGA-V5-A7RE	500	0	45	MALE	G2	Stage IB	T1	M0	N0
TCGA-V5-AASV	467	0	67	MALE	G3	Stage IIB	T3	MX	N0
TCGA-V5-AASW	282	0	72	MALE	G3	Stage IIB	T3	MX	N0
TCGA-V5-AASX	273	0	74	MALE	G2	Stage IIB	T3	MX	N0
TCGA-VR-A8EO	785	0	49	MALE	G3	Stage IIA	T3	M0	N0
TCGA-VR-A8EP	824	0	51	MALE	G3	Stage IIIB	T3	M0	N2
TCGA-VR-A8EQ	694	1	73	MALE	G2	Stage III	T3	M0	N1
TCGA-VR-A8ER	378	1	54	MALE	GX	Stage III	T4	M0	N1
TCGA-VR-A8ET	47	1	64	MALE	G2	Stage IIA	T2	M0	N0
TCGA-VR-A8EU	557	1	51	MALE	G2	Stage IV	T1	M1	N1
TCGA-VR-A8EW	247	1	57	MALE	G2	Stage IIIB	T3	M0	N2
TCGA-VR-A8EX	855	1	63	MALE	G2	Stage IVA	T1	M1a	N1
TCGA-VR-A8EY	1025	0	44	FEMALE	G1	Stage IIA	T3	M0	N0
TCGA-VR-A8EZ	553	1	47	MALE	G2	Stage IIIC	T3	M0	N3
TCGA-VR-A8Q7	1590	0	60	MALE	G3	Stage IIIA	T3	M0	N1
TCGA-VR-AA4D	1405	1	53	MALE	G2	Stage IIB	T1	M0	N1
TCGA-VR-AA4G	549	0	51	FEMALE	G2	Stage IIIA	T2	M0	N2
TCGA-VR-AA7B	342	0	65	FEMALE	G2	Stage IV	T3	M1	N3
TCGA-VR-AA7D	279	1	58	MALE	G2	Stage IIIC	T3	M0	N3
TCGA-VR-AA7I	484	1	70	MALE	G1	Stage III	T4	M0	N0
TCGA-X8-AAAR	554	0	69	MALE	G1	Stage III	T1	M0	N1
TCGA-XP-A8T6	763	1	54	MALE	G2	Stage IIB	T2	M0	N1
TCGA-XP-A8T7	1254	0	63	FEMALE	G2	Stage IIA	T2	M0	N0
TCGA-XP-A8T8	437	0	49	MALE	G1	Stage IIB	T1	M0	N1
TCGA-Z6-A8JD	104	0	53	MALE	G2	Stage IIB	T3	M0	N0
TCGA-Z6-A8JE	64	0	57	MALE	G3	Stage IIIA	T3	M0	N1
TCGA-Z6-A9VB	40	0	53	MALE	G2	Stage IIIA	T3	M0	N1
TCGA-Z6-AAPN	81	0	57	MALE	G1	Stage IIA	T3	M0	N0
TCGA-ZR-A9CJ	600	1	65	MALE	G3	Stage IIIC	T3	MX	N3
